# Supplementary material
Source: HighWire-hosted journal article supplement (https://bmjopen.bmj.com/content/12/3/e056086)
Supplement: inline-supplementary-material-1 [file inline-supplementary-material-1.pdf]

## Supporting information

Dupraz J, Le Pogam M-A, Peytreman Bridevaux I. Early impact of the COVID-19 pandemic on in-person outpatient care utilization: A rapid review.

**S1 Table.** Search strategies.

**S2 Table.** Reasons for exclusion of full-text articles.

**S3 Table.** Full list of included articles.

**S1 Table.** Search strategies.**1) Ovid MEDLINE and Epub Ahead of Print, In-Process & Other Non-Indexed Citations and Daily**

|   |                                                                                                                                                                                                                                                                                                                                                                                                                                                                                                                                                                                                                                                                                                                                                                                                                                                                                                                                                                                                |
|---|------------------------------------------------------------------------------------------------------------------------------------------------------------------------------------------------------------------------------------------------------------------------------------------------------------------------------------------------------------------------------------------------------------------------------------------------------------------------------------------------------------------------------------------------------------------------------------------------------------------------------------------------------------------------------------------------------------------------------------------------------------------------------------------------------------------------------------------------------------------------------------------------------------------------------------------------------------------------------------------------|
| 1 | (Ambulatory Care/ or exp Ambulatory Care Facilities/sn, sd, td or "Facilities and Services Utilization"/ or Office Visits/sn, td or Outpatients/ or ((ambulatory or outpatient).ti,ab,hw. and (cancel* or reduc*).ti,ab.) or ((ambulatory or clinic or healthcare or health care or outpatient or primary care) adj2 (patterns or provide* or provision or practices or "use" or utilisation or utilization or visit*).ti,ab.)<br><b>AND</b> ((wuhan and (coronavirus or corona virus)).mp. or coronavirus*.ti. or COVID*.mp. or nCov.mp. or 2019 ncov.mp. or novel coronavirus.mp. or novel corona virus.mp. or covid-19.mp. or SARS-COV-2.mp. or Severe Acute Respiratory Syndrome Coronavirus 2.mp. or coronavirus disease 2019.mp. or corona virus disease 2019.mp. or new coronavirus.mp. or new corona virus.mp. or new coronaviruses.mp. or novel coronaviruses.mp. or Severe Acute Respiratory Syndrome Coronavirus 2.nm. or 2019 ncov.mp. or nCov 2019.mp. or SARS Coronavirus 2.mp.) |
| 2 | limit 1 to yr="2020 -2021"                                                                                                                                                                                                                                                                                                                                                                                                                                                                                                                                                                                                                                                                                                                                                                                                                                                                                                                                                                     |

**2) Embase**

('ambulatory care'/exp OR (('outpatient department'/de OR 'health center'/de OR 'community mental health center'/de) AND 'health care utilization'/exp) OR 'facilities and services utilization'/de OR 'outpatient'/de OR ((ambulatory OR outpatient):ti,ab,de AND (cancel\* OR reduc\* ):ti,ab) OR ((ambulatory OR clinic OR healthcare OR "health care" OR outpatient OR "primary care") NEAR/2 (patterns OR provide\* OR provision OR practices OR "use" OR utilisation OR utilization OR visit\*)):ti,ab)

**AND** ((wuhan AND (coronavirus OR "corona virus")) OR coronavirus\*:ti OR COVID\* OR nCov OR "2019 ncov" OR "novel coronavirus" OR "novel corona virus" OR "covid 19" OR "SARS-COV-2" OR "Severe Acute Respiratory Syndrome Coronavirus 2" OR "coronavirus disease 2019" OR "corona virus disease 2019" OR "new coronavirus" OR "new corona virus" OR "new coronaviruses" OR "novel coronaviruses" OR "Severe Acute Respiratory Syndrome Coronavirus 2" OR "2019 ncov" OR "nCov 2019" OR "SARS Coronavirus 2")

**AND** [2000-2021]/py

**NOT** ('conference abstract'/it OR 'conference review'/it)

**S2 Table.** Reasons for exclusion of full-text articles.

|                                                          | <b>n (%)</b>       |
|----------------------------------------------------------|--------------------|
| No quantitative results or non-usable results            | 46 (41.1)          |
| Out-of-scope                                             | 24 (21.4)          |
| Condition most often requiring hospitalization           | 20 (17.9)          |
| No distinction between in-person visits and telemedicine | 10 (8.9)           |
| Review                                                   | 8 (7.1)            |
| Protocol/planned study                                   | 2 (1.8)            |
| Multiple reports of the same study                       | 2 (1.8)            |
| <b>Total</b>                                             | <b>112 (100.0)</b> |

**S3 Table.** Full list of included articles.

1. Abdela SG, Berhanu AB, Ferede LM, van Griensven J. Essential Healthcare Services in the Face of COVID-19 Prevention: Experiences from a Referral Hospital in Ethiopia. *Am J Trop Med Hyg.* 2020;103(3):1198-200.
2. Abrashkin KA, Zhang J, Poku A. Acute, Post-acute, and Primary Care Utilization in a Home-Based Primary Care Program During COVID-19. *Gerontologist.* 2021;61(1):78-85.
3. Agarwal M, Udare A, Alabousi A, van der Pol CB, Ramonas L, Mascola K, et al. Impact of the COVID-19 pandemic on emergency CT head utilization in Ontario-an observational study of tertiary academic hospitals. *Emerg Radiol.* 2020;27(6):791-7.
4. Agarwal M, Udare A, Patlas M, Ramonas M, Alaref AA, Rozenberg R, et al. Effect of COVID-19 on computed tomography usage and critical test results in the emergency department: an observational study. *CMAJ Open.* 2020;8(3):E568-E76.
5. Agarwal R, Sharma N, Patil A, Thakur H, Saxena R, Kumar A. Impact of COVID-19 pandemic, national lockdown, and unlocking on an apex tertiary care ophthalmic institute. *Indian J Ophthalmol.* 2020;68(11):2391-5.
6. Aghemo A, Masarone M, Montagnese S, Petta S, Ponziani FR, Russo FP, et al. Assessing the impact of COVID-19 on the management of patients with liver diseases: A national survey by the Italian association for the study of the Liver. *Dig Liver Dis.* 2020;52(9):937-41.
7. Ak N, Vatanserver S. "Door to Treatment" Outcomes of Cancer Patients during the COVID-19 Pandemic. *Chemotherapy.* 2020;65(5-6):141-6.
8. Akhtar N, Rajan S, Chakrabarti D, Kumar V, Gupta S, Misra S, et al. Continuing cancer surgery through the first six months of the COVID-19 pandemic at an academic university hospital in India: A lower-middle-income country experience. *J Surg Oncol.* 2021;123(5):1177-87.
9. Akuaake LM, Hendrikse C, Spittal G, Evans K, van Hoving DJ. Cross-sectional study of paediatric case mix presenting to an emergency centre in Cape Town, South Africa, during COVID-19. *BMJ Paediatrics Open.* 2020;4(1).
10. Akuamo-Boateng D, Wegen S, Ferdinandus J, Marksteder R, Baues C, Marnitz S. Managing patient flows in radiation oncology during the COVID-19 pandemic : Reworking existing treatment designs to prevent infections at a German hot spot area University Hospital. *Strahlenther Onkol.* 2020;196(12):1080-5.
11. Albano D, Bruno A, Bruno F, Calandri M, Caruso D, Clemente A, et al. Impact of coronavirus disease 2019 (COVID-19) emergency on Italian radiologists: a national survey. *Eur Radiol.* 2020;30(12):6635-44.
12. Alborai M, Piscoya A, Tran QT, Mendelsohn RB, Butt AS, Lenz L, et al. The global impact of COVID-19 on gastrointestinal endoscopy units: An international survey of endoscopists. *Arab J Gastroenterol.* 2020;21(3):156-61.
13. Alexander GC, Tajanlangit M, Heyward J, Mansour O, Qato DM, Stafford RS. Use and Content of Primary Care Office-Based vs Telemedicine Care Visits During the COVID-19 Pandemic in the US. *JAMA Netw Open.* 2020;3(10):e2021476.
14. Allevi F, Dionisio A, Baciliero U, Balercia P, Beltramini GA, Bertossi D, et al. Impact of COVID-19 epidemic on maxillofacial surgery in Italy. *Br J Oral Maxillofac Surg.* 2020;58(6):692-7.
15. Al-Marhoon MS. The Impact of COVID-19 on Urology Practice in Oman. *Sultan Qaboos Univ Med J.* 2020;20(4):e404-e5.
16. Almeida ALC, Santo T, Mello MSS, Cedro AV, Lopes NL, Ribeiro A, et al. Repercussions of the COVID-19 Pandemic on the Care Practices of a Tertiary Hospital. *Arq Bras Cardiol.* 2020;115(5):862-70.
17. Alonso de Lecinana M, Castellanos M, Ayo-Martin O, Morales A, Stroke Group - Spanish Society of N. Stroke care during the COVID-19 outbreak in Spain: the experience of Spanish stroke units. *Stroke Vasc Neurol.* 2020;04:04.

18. AlShehry MZ, Duraisamy B, Zaidi ARZ, AlShehry NF, Zaidi FZ, Rababah AA, et al. COVID-19 and Palliative Care Services: Comparative Patterns of Inpatient, Outpatient, and Consultation Services in a Tertiary Care Center in Riyadh. *Cureus*. 2020;12(12):e11996.
19. Alvarez Garcia N, Nunez Garcia B, Perez-Gaspar M, Jimenez Gomez J, Betancourth Alvarenga J, Santiago Martinez S, et al. Immediate impact of the COVID-19 pandemic on pediatric surgery: analysis of a tertiary healthcare facility. *Cir Pediatr*. 2021;34(1):34-8.
20. Ambrosetti J, Macheret L, Folliet A, Wullschlegler A, Amerio A, Aguglia A, et al. Impact of the COVID-19 Pandemic on Psychiatric Admissions to a Large Swiss Emergency Department: An Observational Study. *Int J Environ Res Public Health*. 2021;18(3):28.
21. Ammor YM, Kaitouni ZI, Darfaoui M, Lalya I, Elomrani A, Khouchani M. Managing cancer patients during COVID-19 pandemic: a North African oncological center experience. *Pan Afr Med J*. 2020;35(Suppl 2):144.
22. Angoulvant F, Ouldali N, Yang DD, Filser M, Gajdos V, Rybak A, et al. COVID-19 pandemic: Impact caused by school closure and national lockdown on pediatric visits and admissions for viral and non-viral infections, a time series analysis. *Clin Infect Dis*. 2020;03:03.
23. Antarikh W, Sandeep S, Swapnil D. Effect of Covid-19 lockdown in trauma cases of Rural India. *International Journal of Research in Pharmaceutical Sciences*. 2020;11(SPL1):365-8.
24. Anteby R, Zager Y, Barash Y, Nadler R, Cordoba M, Klang E, et al. The Impact of the Coronavirus Disease 2019 Outbreak on the Attendance of Patients with Surgical Complaints at a Tertiary Hospital Emergency Department. *J Laparoendosc Adv Surg Tech A*. 2020;30(9):1001-7.
25. Antonucci M, Recupero SM, Marzio V, De Dominicis M, Pinto F, Foschi N, et al. The impact of COVID-19 outbreak on urolithiasis emergency department admissions, hospitalizations and clinical management in central Italy: a multicentric analysis. *Actas Urol Esp (Engl Ed)*. 2020;44(9):611-6.
26. Aragona M, Barbato A, Cavani A, Costanzo G, Mirisola C. Negative impacts of COVID-19 lockdown on mental health service access and follow-up adherence for immigrants and individuals in socio-economic difficulties. *Public Health*. 2020;186:52-6.
27. Araujo SEA, Leal A, Centrone AFY, Teich VD, Malheiro DT, Cypriano AS, et al. Impact of COVID-19 pandemic on care of oncological patients: experience of a cancer center in a Latin American pandemic epicenter. *Einstein (Sao Paulo)*. 2020;19:eAO6282.
28. Assenza G, Lanzone J, Ricci L, Boscarino M, Tombini M, Galimberti CA, et al. Electroencephalography at the time of Covid-19 pandemic in Italy. *Neurol Sci*. 2020;41(8):1999-2004.
29. Athiel Y, Civadier MS, Luton D, Ceccaldi PF, Bourret A, Sroussi J, et al. Impact of the outbreak of SARS-CoV-2 infection on urgent gynecological care. *J Gynecol Obstet Hum Reprod*. 2020;49(8):101841.
30. Atreya S, Kumar G, Samal J, Bhattacharya M, Banerjee S, Mallick P, et al. Patients'/Caregivers' Perspectives on Telemedicine Service for Advanced Cancer Patients during the COVID-19 Pandemic: An Exploratory Survey. *Indian J Palliat Care*. 2020;26(Suppl 1):S40-S4.
31. Auerbach MA, Abulebda K, Bona AM, Falvo L, Hughes PG, Wagner M, et al. A National US Survey of Pediatric Emergency Department Coronavirus Pandemic Preparedness. *Pediatr Emerg Care*. 2021;37(1):48-53.
32. Autran-Gomez AM, Tobia I, Molina RC, Covarrubias FR, Benzing F, Maruccia S, et al. Exploring Urological Experience in the COVID-19 Outbreak: American Confederation of Urology (CAU) Survey. *Int Braz J Urol*. 2020;46(suppl.1):156-64.
33. Ayyaz M, Butt UI, Umar M, Khan WH, Kashif MR, Hyidar Z. Effect of COVID-19 on the Working of a Tertiary Care Hospital. *J Coll Physicians Surg Pak*. 2020;30(10):164-7.
34. Babu N, Kohli P, Mishra C, Sen S, Arthur D, Chhablani D, et al. To evaluate the effect of COVID-19 pandemic and national lockdown on patient care at a tertiary-care ophthalmology institute. *Indian J Ophthalmol*. 2020;68(8):1540-4.
35. Ball S, Banerjee A, Berry C, Boyle JR, Bray B, Bradlow W, et al. Monitoring indirect impact of COVID-19 pandemic on services for cardiovascular diseases in the UK. *Heart*. 2020;106(24):1890-7.

36. Ballesta-Martinez S, Navarro-Perez MP, Espinosa-Rueda J, Marin-Gracia M, Garcia-Noain JA, Munoz-Farjas E. Care of neurology patients in a hospital emergency department during the lockdown period for COVID-19: a comparative analysis. *Emergencias*. 2020;32(6):442-4.
37. Ballesterio MFM, Furlanetti L, de Oliveira RS. Pediatric neurosurgery during the COVID-19 pandemic: update and recommendations from the Brazilian Society of Pediatric Neurosurgery. *Neurosurg Focus*. 2020;49(6):E2.
38. Bamaga AK, Alharbi O, Bajuaifer M, Batarfi A, Althobaiti KH, AlQusaibi B. The Effect of the COVID-19 Pandemic on Emergency Department Visits for Neurological Diseases in Saudi Arabia. *Cureus*. 2020;12(12):e12200.
39. Barten DG, Latten GHP, van Osch FHM. Reduced Emergency Department Utilization During the Early Phase of the COVID-19 Pandemic: Viral Fear or Lockdown Effect? *Disaster Med Public Health Prep*. 2020:1-4.
40. Basis F, Zeidani H, Hussein K, Hareli S. Drastic Reduction Inpatient Visits to the Emergency Department in a Hospital in Israel During the COVID-19 Outbreak, Compared to the H1N1 2009. *Int J Health Policy Manag*. 2020;09:09.
41. Batra PS, LoSavio PS, Michaelides E, Revenaugh PC, Tajudeen BA, Al-Khudari S, et al. Management of the Clinical and Academic Mission in an Urban Otolaryngology Department During the COVID-19 Global Crisis. *Otolaryngol Head Neck Surg*. 2020;163(1):162-9.
42. Baugh JJ, White BA, McEvoy D, Yun BJ, Brown DFM, Raja AS, et al. The cases not seen: Patterns of emergency department visits and procedures in the era of COVID-19. *Am J Emerg Med*. 2020;05:05.
43. Baum A, Kaboli PJ, Schwartz MD. Reduced In-Person and Increased Telehealth Outpatient Visits During the COVID-19 Pandemic. *Ann Intern Med*. 2021;174(1):129-31.
44. Bechini A, Garamella G, Giammarco B, Zanella B, Flori V, Bonanni P, et al. Paediatric activities and adherence to vaccinations during the COVID-19 epidemic period in Tuscany, Italy: a survey of paediatricians. *J Prev Med Hyg*. 2020;61(2):E125-E9.
45. Beghi M, Brandolini R, Casolaro I, Beghi E, Cornaggia CM, Fraticelli C, et al. Effects of lockdown on emergency room admissions for psychiatric evaluation: an observational study from the AUSL Romagna, Italy. *Int J Psychiatry Clin Pract*. 2020:1-5.
46. Belcher RH, Phillips J, Virgin F, Werkhaven J, Whigham A, Wilcox L, et al. Pediatric Otolaryngology Telehealth in Response to COVID-19 Pandemic: Lessons Learned and Impact on the Future Management of Pediatric Patients. *Ann Otol Rhinol Laryngol*. 2021;130(7):788-95.
47. Benazzo F, Rossi SMP, Maniscalco P, Moretti B, Vaienti E, Ruggieri P, et al. The orthopaedic and traumatology scenario during Covid-19 outbreak in Italy: chronicles of a silent war. *Int Orthop*. 2020;44(8):1453-9.
48. Berlin A, Lovas M, Truong T, Melwani S, Liu J, Liu ZA, et al. Implementation and Outcomes of Virtual Care Across a Tertiary Cancer Center During COVID-19. *JAMA Oncol*. 2021;7(4):597-602.
49. Bernardino R, Gil M, Andrade V, Severo L, Alves M, Papoila AL, et al. What has changed during the state of emergency due to COVID-19 on an Academic Urology Department of a Tertiary Hospital in Portugal. *Actas Urol Esp (Engl Ed)*. 2020;44(9):604-10.
50. Bertaglia V, Reale ML, Bironzo P, Palesandro E, Mariniello A, Leone G, et al. Italian survey on the clinical management of non-small cell lung cancer patients during the COVID-19 pandemic: A lesson for the second wave. *Crit Rev Oncol Hematol*. 2021;157:103189.
51. Birsel O, Eren I, Demirhan M. How the Covid-19 pandemic affected shoulder and elbow practice in Turkey? *JSES Int*. 2020;4(4):705-8 e2.
52. Birsel SE, Sarikaya IA, Seker A, Erdal OA, Gorgun B, Inan M. How the COVID-19 pandemic is affecting paediatric orthopaedic practice in Turkey. *J Child Orthop*. 2020;14(6):581-8.
53. Bjornsen LP, Naess-Pleyrn LE, Dale J, Laugsand LE. Patient visits to an emergency department in anticipation of the COVID-19 pandemic. *Tidsskr Nor Laegeforen*. 2020;140(8).

54. Bodington R, Bhandari S. Falling usage of hospital-based emergency care during the COVID-19 pandemic in the UK. *J R Coll Physicians Edinb.* 2020;50(2):207-14.
55. Bodini G, Demarzo MG, Casagrande E, De Maria C, Kayali S, Ziola S, et al. Concerns related to COVID-19 pandemic among patients with inflammatory bowel disease and its influence on patient management. *Eur J Clin Invest.* 2020;50(5):e13233.
56. Bola S, Jaikaransingh D, Winter SC. COVID-19 and the return to head and neck outpatient activity in the United Kingdom: what is the new normal? *Eur Arch Otorhinolaryngol.* 2021;278(7):2641-8.
57. Borgmann H, Struck JP, Mattigk A, Wenzel M, Pilatz A, Kranz J, et al. Increased Severe Adverse Outcomes and Decreased Emergency Room Visits for Pyelonephritis: First Report of Collateral Damage during COVID-19 Pandemic in Urology. *Urol Int.* 2021;105(3-4):199-205.
58. Borrelli E, Grosso D, Vella G, Sacconi R, Querques L, Zucchiatti I, et al. Impact of COVID-19 on outpatient visits and intravitreal treatments in a referral retina unit: let's be ready for a plausible "rebound effect". *Graefes Arch Clin Exp Ophthalmol.* 2020;258(12):2655-60.
59. Boschetti GA, Di Gregorio S, Mena Vera JM, Pane B, Spinella G, Palombo D, et al. COVID-19 Impact on Vascular Surgery Practice: Experience From an Italian University Regional Hub Center for Vascular Pathology. *Ann Vasc Surg.* 2021;05:05.
60. Boserup B, McKenney M, Elkbuli A. The impact of the COVID-19 pandemic on emergency department visits and patient safety in the United States. *Am J Emerg Med.* 2020;38(9):1732-6.
61. Bozkurt O, Sen V, Irer B, Sagnak L, Onal B, Tanidir Y, et al. Nation-wide analysis of the impact of Covid-19 pandemic on daily urology practice in Turkey. *Int J Clin Pract.* 2021;75(4):e13735.
62. Bozovich GE, Alves De Lima A, Fosco M, Burgos LM, Martinez R, Dupuy De Lome R, et al. [Collateral damage of COVID-19 pandemic in private healthcare centres of Argentina]. *Medicina (B Aires).* 2020;80 Suppl 3:37-41.
63. Bram JT, Johnson MA, Magee LC, Mehta NN, Fazal FZ, Baldwin KD, et al. Where Have All the Fractures Gone? The Epidemiology of Pediatric Fractures During the COVID-19 Pandemic. *J Pediatr Orthop.* 2020;40(8):373-9.
64. Brandes AA, Ardizzoni A, Artioli F, Cappuzzo F, Cavanna L, Frassinetti GL, et al. Fighting cancer in coronavirus disease era: organization of work in medical oncology departments in Emilia Romagna region of Italy. *Future Oncol.* 2020;16(20):1433-9.
65. Bres Bullrich M, Fridman S, Mandzia JL, Mai LM, Khaw A, Vargas Gonzalez JC, et al. COVID-19: Stroke Admissions, Emergency Department Visits, and Prevention Clinic Referrals. *Can J Neurol Sci.* 2020;47(5):693-6.
66. Buckstein M, Skubish S, Smith K, Braccia I, Green S, Rosenzweig K. Experiencing the Surge: Report From a Large New York Radiation Oncology Department During the COVID-19 Pandemic. *Adv Radiat Oncol.* 2020;5(4):610-6.
67. Butt AA, Azad AM, Kartha AB, Masoodi NA, Bertollini R, Abou-Samra AB. Volume and Acuity of Emergency Department Visits Prior To and After COVID-19. *J Emerg Med.* 2020;59(5):730-4.
68. Cahalane AM, Cui J, Sheridan RM, Thabet A, Sutphin PD, Palmer WE, et al. Changes in Interventional Radiology Practice in a Tertiary Academic Center in the United States During the Coronavirus Disease 2019 (COVID-19) Pandemic. *J Am Coll Radiol.* 2020;17(7):873-7.
69. Cakici MC, Temiz MZ, Iplik CA, Ozgor F, Aksoy AK, Ozer M, et al. The clinical impact of the COVID-19 pandemic on daily urological practice: First 3 month multicenter results from Istanbul. *Turk J Med Sci.* 2021;12:12.
70. Campbell E, Zahoor U, Payne A, Popova D, Welman T, Pahal GS, et al. The COVID-19 Pandemic: The effect on open lower limb fractures in a London major trauma centre - a plastic surgery perspective. *Injury.* 2021;52(3):402-6.
71. Cao YG, Li Y, Shen J, Shao MM, Lin XD, Zhu JJ, et al. Clinical activity changes in the neurology department of Wenzhou during the COVID-19 pandemic: an observational analysis. *Neurol Sci.* 2021;42(5):1653-9.
72. Capuzzi E, Di Brita C, Caldiroli A, Colmegna F, Nava R, Buoli M, et al. Psychiatric emergency care during Coronavirus 2019 (COVID 19) pandemic lockdown: results from a Department of Mental Health and Addiction of northern Italy. *Psychiatry Res.* 2020;293:113463.

73. Carlon T, Finkelstein M, Maron SZ, Goldman D, Kihira S, Marinelli B, et al. Sources of Revenue Loss and Recovery in Radiology Practices During the Coronavirus Disease 2019 (COVID-19) Pandemic. *Acad Radiol*. 2021;28(4):447-56.
74. Carpiello B, Tusconi M, di Sciascio G, Zanaldi E, di Giannantonio M, Executive Committee of the Italian Society of P. Mental health services in Italy during the COVID-19 pandemic. *Psychiatry Clin Neurosci*. 2020;74(8):442-3.
75. Carvalho HA, Vasconcelos K, Gomes HC, Salvajoli JV. Impact of COVID-19 pandemic on a daily-based outpatient treatment routine: experience of a radiotherapy department of a tertiary public/university hospital in Brazil. *Clinics (Sao Paulo)*. 2020;75:e2298.
76. Casalino E, Choquet C, Bouzid D, Peyrony O, Curac S, Revue E, et al. Analysis of Emergency Department Visits and Hospital Activity during Influenza Season, COVID-19 Epidemic, and Lockdown Periods in View of Managing a Future Disaster Risk: A Multicenter Observational Study. *Int J Environ Res Public Health*. 2020;17(22):10.
77. Cases-Perera O, Losilla-Rodriguez J, Rivera-Lopez R. [COVID-19 lockdown impact on plastic surgery activity in the emergency department]. *Med Clin (Barc)*. 2021;156(3):139-40.
78. Castagneto-Gissey L, Casella G, Russo MF, Del Corpo G, Iodice A, Lattina I, et al. Impact of COVID-19 outbreak on emergency surgery and emergency department admissions: an Italian level 2 emergency department experience. *Br J Surg*. 2020;107(10):e374-e5.
79. Castelpietra G, Colli C, Tossut D, Furlan M, Balestrieri M, Starace F, et al. The impact of Covid-19 pandemic on community-oriented mental health services: The experience of Friuli Venezia Giulia region, Italy. *Health Policy Technol*. 2021;10(1):143-50.
80. Chaiyachati BH, Agawu A, Zorc JJ, Balamuth F. Trends in Pediatric Emergency Department Utilization after Institution of Coronavirus Disease-19 Mandatory Social Distancing. *J Pediatr*. 2020;20:20.
81. Chan CYW, Chiu CK, Cheung JPY, Cheung PWH, Gani SMA, Kwan MK. The Impact of COVID-19 pandemic on Spine Surgeons: An Asia Pacific Spine Society (APSS) Survey. *Spine (Phila Pa 1976)*. 2020;45(18):1285-92.
82. Chatterji P, Li Y. Effects of the COVID-19 Pandemic on Outpatient Providers in the United States. *Med Care*. 2021;59(1):58-61.
83. Chazan G, Franchini F, Alexander M, Banerjee S, Mileshkin L, Blinman P, et al. Impact of COVID-19 on cancer service delivery: results from an international survey of oncology clinicians. *ESMO open*. 2020;5(6):e001090.
84. Cheek JA, Craig SS, West A, Lewena S, Hiscock H. Emergency department utilisation by vulnerable paediatric populations during the COVID-19 pandemic. *Emerg Med Australas*. 2020;32(5):870-1.
85. Cheli M, Dinoto A, Olivo S, Tomaselli M, Stokelj D, Cominotto F, et al. SARS-CoV-2 pandemic and epilepsy: The impact on emergency department attendances for seizures. *Seizure*. 2020;82:23-6.
86. Chen Y, Yu Q, Farraye FA, Kochhar GS, Bernstein CN, Navaneethan U, et al. Patterns of endoscopy during COVID-19 pandemic: a global survey of interventional inflammatory bowel disease practice. *Intest Res*. 2020;02:02.
87. Chiang J, Yang VS, Han S, Zhuang Q, Ooi G, Sin IH, et al. Minimizing transmission of COVID-19 while delivering optimal cancer care in a National Cancer Centre. *J Cancer Policy*. 2020;25:100241.
88. Chiu TGA, Leung WCY, Zhang Q, Lau EHY, Ho RW, Chan HS, et al. Changes in pediatric seizure-related emergency department attendances during COVID-19 - A territory-wide observational study. *J Formos Med Assoc*. 2020;21:21.
89. Cho J, Lee S, Gu BS, Jung SH, Kim HY. The Impact of COVID-19 on the Use of Radiology Resources in a Tertiary Hospital. *J Korean Med Sci*. 2020;35(40):e368.
90. Choi DH, Jung JY, Suh D, Choi JY, Lee SU, Choi YJ, et al. Impact of the COVID-19 Outbreak on Trends in Emergency Department Utilization in Children: a Multicenter Retrospective Observational Study in Seoul Metropolitan Area, Korea. *J Korean Med Sci*. 2021;36(5):e44.
91. Chong SL, Soo JSL, Allen JC, Jr., Ganapathy S, Lee KP, Tyebally A, et al. Impact of COVID-19 on pediatric emergencies and hospitalizations in Singapore. *BMC Pediatr*. 2020;20(1):562.



92. Chou YC, Yen YF, Feng RC, Wu MP, Lee YL, Chu D, et al. Impact of the COVID-19 Pandemic on the Utilization of Hospice Care Services: A Cohort Study in Taiwan. *J Pain Symptom Manage*. 2020;60(3):e1-e6.
93. Chu KM, Smith M, Steyn E, Goldberg P, Bougard H, Buccimazza I. Changes in surgical practice in 85 South African hospitals during COVID-19 hard lockdown. *S Afr Med J*. 2020;110(9):916-9.
94. Ciacchini B, Tonioli F, Marciano C, Faticato MG, Borali E, Pini Prato A, et al. Reluctance to seek pediatric care during the COVID-19 pandemic and the risks of delayed diagnosis. *Ital J Pediatr*. 2020;46(1):87.
95. Cicerello E, Mangano MS, Cova G, Zordani A. Urological emergency activities during COVID-19 pandemic: Our experience. *Arch Ital Urol Androl*. 2020;92(4):17.
96. Ciofi Degli Atti ML, Campana A, Muda AO, Concato C, Rava L, Ricotta L, et al. Facing SARS-CoV-2 Pandemic at a COVID-19 Regional Children's Hospital in Italy. *Pediatr Infect Dis J*. 2020;39(9):e221-e5.
97. Clavenna A, Nardelli S, Sala D, Fontana M, Biondi A, Bonati M. Impact of COVID-19 on the Pattern of Access to a Pediatric Emergency Department in the Lombardy Region, Italy. *Pediatr Emerg Care*. 2020;36(10):e597-e8.
98. Cohen BA, Wessling EG, Serina PT, Cruz DS, Kim HS, McCarthy DM, et al. Emergency department operations in a large health system during COVID-19. *Am J Emerg Med*. 2021;41:241-3.
99. Collins PM, Madden A, O'Connell C, Omer SA, Shakeel Inder M, Casey RG, et al. Urological service provision during the COVID-19 period: the experience from an Irish tertiary centre. *Ir J Med Sci*. 2021;190(2):455-60.
100. Connolly SL, Stolzmann KL, Heyworth L, Weaver KR, Bauer MS, Miller CJ. Rapid Increase in Telemental Health Within the Department of Veterans Affairs During the COVID-19 Pandemic. *Telemed J E Health*. 2021;27(4):454-8.
101. Correia M, Constancio V, Silva JC, Lima P, Moreira M, Antunes LF, et al. Is There an Impact of COVID-19 on Admission of Patients to the Emergency Department for Vascular Surgery? *Ann Vasc Surg*. 2020;69:100-4.
102. Cozzi G, Zanchi C, Giangreco M, Rabach I, Calligaris L, Giorgi R, et al. The impact of the COVID-19 lockdown in Italy on a paediatric emergency setting. *Acta Paediatr*. 2020;109(10):2157-9.
103. Crawford SM, Evans C, Edwards H, Zoltowski A. Requests from primary care for chest X-ray and CA125 measurements during the COVID-19 emergency: An observational study. *Clin Med (Lond)*. 2021;21(1):e45-e7.
104. Crenn V, El Kinani M, Pietu G, Leteve M, Persigant M, Toanen C, et al. Impact of the COVID-19 lockdown period on adult musculoskeletal injuries and surgical management: a retrospective monocentric study. *Sci Rep*. 2020;10(1):22442.
105. Crespo J, Fernandez Carrillo C, Iruzubieta P, Hernandez-Conde M, Rasines L, Jorquera F, et al. Massive impact of coronavirus disease 2019 pandemic on gastroenterology and hepatology departments and doctors in Spain. *J Gastroenterol Hepatol*. 2020;12:12.
106. Dann L, Fitzsimons J, Gorman KM, Hourihane J, Okafor I. Disappearing act: COVID-19 and paediatric emergency department attendances. *Arch Dis Child*. 2020;105(8):810-1.
107. D'Anna L, Sheikh A, Bathula R, Elmamoun S, Oppong A, Singh R, et al. Decreasing referrals to transient ischaemic attack clinics during the COVID-19 outbreak: results from a multicentre cross-sectional survey. *BMJ Open*. 2020;10(10):e041514.
108. D'Asta F, Choong J, Thomas C, Adamson J, Wilson Y, Wilson D, et al. Paediatric burns epidemiology during COVID-19 pandemic and 'stay home' era. *Burns*. 2020;46(6):1471-2.
109. Davico C, Marcotulli D, Lux C, Calderoni D, Terrinoni A, Di Santo F, et al. Where have the children with epilepsy gone? An observational study of seizure-related accesses to emergency department at the time of COVID-19. *Seizure*. 2020;83:38-40.
110. De Bernardi F, Turri-Zanoni M, Battaglia P, Castelnuovo P. How to Reorganize an Ear, Nose, and Throat Outpatient Service During the COVID-19 Outbreak: Report From Northern Italy. *Laryngoscope*. 2020;130(11):2544-5.

111. Dean P, Zhang Y, Frey M, Shah A, Edmunds K, Boyd S, et al. The impact of public health interventions on critical illness in the pediatric emergency department during the SARS-CoV-2 pandemic. *J Am Coll Emerg Physicians Open*. 2020;10:10.
112. DeKeyser GJ, Brodke DS, Saltzman CL, Lawrence BD. Response to the Coronavirus Disease 2019 Pandemic by the Spine Division at a Level-I Academic Referral Center. *J Am Acad Orthop Surg*. 2020;28(24):1003-8.
113. Dell'Utri C, Manzoni E, Cipriani S, Spizzico C, Dell'Acqua A, Barbara G, et al. Effects of SARS Cov-2 epidemic on the obstetrical and gynecological emergency service accesses. What happened and what shall we expect now? *Eur J Obstet Gynecol Reprod Biol*. 2020;254:64-8.
114. Deora H, Mishra S, Tripathi M, Garg K, Tandon V, Borkar S, et al. Adapting Neurosurgery Practice During the COVID-19 Pandemic in the Indian Subcontinent. *World Neurosurg*. 2020;142:e396-e406.
115. Desai SM, Guyette FX, Martin-Gill C, Jadhav AP. Collateral damage - Impact of a pandemic on stroke emergency services. *J Stroke Cerebrovasc Dis*. 2020;29(8):104988.
116. Deshmukh S, Naik S, Zade B, Patwa R, Gawande J, Watgaonkar R, et al. Impact of the pandemic on cancer care: Lessons learnt from a rural cancer center in the first 3 months. *J Surg Oncol*. 2020;122(5):831-8.
117. Dona D, Torres Canizales J, Benetti E, Cananzi M, De Corti F, Calore E, et al. Pediatric transplantation in Europe during the COVID-19 pandemic: Early impact on activity and healthcare. *Clin Transplant*. 2020;34(10):e14063.
118. Dopfer C, Wetzke M, Zychlinsky Scharff A, Mueller F, Dressler F, Baumann U, et al. COVID-19 related reduction in pediatric emergency healthcare utilization - a concerning trend. *BMC Pediatr*. 2020;20(1):427.
119. Dorward J, Khubone T, Gate K, Ngobese H, Sookrajh Y, Mkhize S, et al. The impact of the COVID-19 lockdown on HIV care in 65 South African primary care clinics: an interrupted time series analysis. *Lancet HIV*. 2021;8(3):e158-e65.
120. Doshi AH, Kihira S, Mahmoudi K, Dayan E, Carlon T, Marinelli B, et al. Impact of COVID-19 social distancing regulations on outpatient diagnostic imaging volumes and no-show rates. *Clin Imaging*. 2021;76:65-9.
121. Dragovic M, Pascu V, Hall T, Ingram J, Waters F. Emergency department mental health presentations before and during the COVID-19 outbreak in Western Australia. *Australas Psychiatry*. 2020;28(6):627-31.
122. Drysdale HRE, Ooi S, Geelong Surgical C-RT, Nagra S, Watters DA, Guest GD. Clinical activity and outcomes during Geelong's general surgery response to the coronavirus disease 2019 pandemic. *ANZ J Surg*. 2020;90(9):1573-9.
123. Duarte A, Gouveia EMR, Lopes A, Rato JP, Valente J, Pedro LM. Lessons Learned from the Impact of the COVID-19 Pandemic in a Vascular Surgery Department and Preparation for Future Outbreaks. *Ann Vasc Surg*. 2021;22:22.
124. Durmuş E, Güneysu F. Effect of COVID-19 on the admissions to the adult emergency department. *Journal of Contemporary Clinical Practice*. 2020;6(2):58-63.
125. Duszak R, Jr., Maze J, Sessa C, Fleishon HB, Golding LP, Nicola GN, et al. Characteristics of COVID-19 Community Practice Declines in Noninvasive Diagnostic Imaging Professional Work. *J Am Coll Radiol*. 2020;17(11):1453-9.
126. Earp BE, Zhang D, Benavent KA, Byrne L, Blazar PE. The Early Effect of COVID-19 Restrictions on an Academic Orthopedic Surgery Department. *Orthopedics*. 2020;43(4):228-32.
127. Efthimiou I. Urological Services in the Era of COVID-19. *Urol J*. 2020;17(5):534-5.
128. Einstein AJ, Shaw LJ, Hirschfeld C, Williams MC, Villines TC, Better N, et al. International Impact of COVID-19 on the Diagnosis of Heart Disease. *J Am Coll Cardiol*. 2021;77(2):173-85.
129. El Hajra I, Calvo M, Santos Perez E, Blanco Rey S, Gonzalez Partida I, Matallana V, et al. Consequences and management of COVID-19 on the care activity of an Inflammatory Bowel Disease Unit. *Rev Esp Enferm Dig*. 2021;113(2):98-102.
130. Elhalawany AS, Beastall J, Cousins G. The impact of the COVID-19 lockdown on orthopaedic emergency presentations in a remote and rural population. *Bone Jt Open*. 2020;1(10):621-7.

131. Elli F, Turri-Zanoni M, Arosio AD, Karligkiotis A, Battaglia P, Castelnuovo P. Changes in the use of Otorhinolaryngology Emergency Department during the COVID-19 pandemic: report from Lombardy, Italy. *Eur Arch Otorhinolaryngol.* 2020;277(12):3525-8.
132. Esme P, Akoglu G, Erbil H. Medical and socioeconomic challenges of private dermatocosmetology clinics during COVID-19 pandemic: A survey from Turkey. *J Cosmet Dermatol.* 2020;19(12):3160-5.
133. European Society of Hypertension Coronavirus Disease 19 Task F. The corona-virus disease 2019 pandemic compromised routine care for hypertension: a survey conducted among excellence centers of the European Society of Hypertension. *J Hypertens.* 2021;39(1):190-5.
134. Fahrner R, Bahler S, Lindner G. COVID-19 lock-down significantly reduced number of surgical presentations in an emergency department. *Wien Klin Wochenschr.* 2021;133(7-8):399-402.
135. Fang ZB, Simons JP, Judelson DR, Arous EJ, Jones DW, Steppacher RC, et al. Financial implications of coronavirus disease 2019 on a tertiary academic vascular surgery practice. *J Vasc Surg.* 2021;73(6):1869-75.
136. Farroha A. Effects of COVID-19 pandemic on burns epidemiology. *Burns.* 2020;46(6):1466.
137. Ferahman S, Dural AC, Aydin H, Sahbaz NA, Akarsu C, Peker KD, et al. Analysis of general surgery outpatient clinic admissions and operations during COVID-19 pandemic in Turkey: Reactions of 12728 patients. *Bratisl Lek Listy.* 2020;121(7):475-80.
138. Ferguson JM, Jacobs J, Yefimova M, Greene L, Heyworth L, Zulman DM. Virtual care expansion in the Veterans Health Administration during the COVID-19 pandemic: clinical services and patient characteristics associated with utilization. *J Am Med Inform Assoc.* 2021;28(3):453-62.
139. Fersia O, Bryant S, Nicholson R, McMeeken K, Brown C, Donaldson B, et al. The impact of the COVID-19 pandemic on cardiology services. *Open Heart.* 2020;7(2):08.
140. Fiehler J, Brouwer P, Diaz C, Hirsch JA, Kulcsar Z, Liebeskind D, et al. COVID-19 and neurointerventional service worldwide: a survey of the European Society of Minimally Invasive Neurological Therapy (ESMINT), the Society of NeuroInterventional Surgery (SNIS), the Sociedad Iberolatinoamericana de Neuroradiologia Diagnostica y Terapeutica (SILAN), the Society of Vascular and Interventional Neurology (SVIN), and the World Federation of Interventional and Therapeutic Neuroradiology (WFITN). *J Neurointerv Surg.* 2020;12(8):726-30.
141. Freudenberg LS, Dittmer U, Herrmann K. Impact of COVID-19 on Nuclear Medicine in Germany, Austria and Switzerland: An International Survey in April 2020. *Nuklearmedizin.* 2020;59(4):294-9.
142. Freudenberg LS, Paez D, Giammarile F, Cerci J, Modiselle M, Pascual TNB, et al. Global Impact of COVID-19 on Nuclear Medicine Departments: An International Survey in April 2020. *J Nucl Med.* 2020;61(9):1278-83.
143. Freudenberg S, Vossen D. [Impact of COVID-19 on rheumatological care : A national survey in April 2020]. *Z Rheumatol.* 2020;79(6):584-9.
144. Friedman AB, Barfield D, David G, Diller T, Gunnarson C, Liu M, et al. Delayed emergencies: The composition and magnitude of non-respiratory emergency department visits during the COVID-19 pandemic. *J Am Coll Emerg Physicians Open.* 2021;2(1):e12349.
145. Frustaci AM, Zamprogna G, Deodato M, Cairoli R, Montillo M, Tedeschi A. The management of chronic lymphoproliferative disorders at the time of SARS-Covid2 pandemic: weathering the storm. *Leuk Lymphoma.* 2020;61(13):3278-9.
146. Gabriel C, Mathiot A, Boumediene M, Vernet P, Schwebel M, de Figueiredo C, et al. Organization of outpatient consultations at a hand surgery department in a French university hospital during the COVID-19 lockdown. *Hand Surg Rehabil.* 2021;40(1):17-24.
147. Gallioli A, Albo G, Lievore E, Boeri L, Longo F, Spinelli MG, et al. How the COVID-19 Wave Changed Emergency Urology: Results From an Academic Tertiary Referral Hospital in the Epicentre of the Italian Red Zone. *Urology.* 2021;147:43-9.
148. Gallo G, Sturiale A, De Simone V, Di Tanna GL, Giani I, Grossi U, et al. A worldwide survey on proctological practice during COVID-19 lockdown (ProctoLock 2020): a cross-sectional analysis. *Colorectal Dis.* 2021;23(1):246-64.

149. Gallo O, Locatello LG, Orlando P, Martelli F, Bruno C, Cilona M, et al. The clinical consequences of the COVID-19 lockdown: A report from an Italian referral ENT department. *Laryngoscope Investig Otolaryngol.* 2020;26:26.
150. Gao C, Liu B, Xie Y, Wu Z. Change of dermatological practice after the COVID-19 outbreak resolves. *J Dermatolog Treat.* 2020:1-3.
151. Garrafa E, Levaggi R, Miniaci R, Paolillo C. When fear backfires: Emergency department accesses during the Covid-19 pandemic. *Health Policy.* 2020;124(12):1333-9.
152. Gelardi M, Iannuzzi L, Trecca EMC, Kim B, Quaranta NAA, Cassano M. COVID-19: what happened to all of the otolaryngology emergencies? *Eur Arch Otorhinolaryngol.* 2020;277(11):3231-2.
153. Giacalone S, Bortoluzzi P, Nazzaro G. Which are the "emergent" dermatologic practices during COVID-19 pandemic? Report from the lockdown in Milan, Italy. *Int J Dermatol.* 2020;59(8):e269-e70.
154. Giamello JD, Abram S, Bernardi S, Lauria G. The emergency department in the COVID-19 era. Who are we missing? *Eur J Emerg Med.* 2020;27(4):305-6.
155. Giannouchos TV, Biskupiak J, Moss MJ, Brixner D, Andreyeva E, Ukert B. Trends in outpatient emergency department visits during the COVID-19 pandemic at a large, urban, academic hospital system. *Am J Emerg Med.* 2021;40:20-6.
156. Gibson AL, Chen BY, Rosen MP, Paez SN, Lo HS. Impact of the COVID-19 pandemic on emergency department CT for suspected diverticulitis. *Emerg Radiol.* 2020;27(6):773-80.
157. Gilson SF, Umscheid CA, Laiteerapong N, Ossey G, Nunes KJ, Shah SD. Growth of Ambulatory Virtual Visits and Differential Use by Patient Sociodemographics at One Urban Academic Medical Center During the COVID-19 Pandemic: Retrospective Analysis. *JMIR Med Inform.* 2020;8(12):e24544.
158. Ginat DT, Kenniff J. Impact of the COVID-19 pandemic on neuroimaging scan volumes at a teaching hospital. *Neuroradiol J.* 2021;34(3):238-44.
159. Gironi LC, Boggio P, Giorgione R, Esposto E, Tarantino V, Damiani G, et al. The impact of COVID-19 pandemics on dermatologic surgery: real-life data from the Italian Red-Zone. *J Dermatolog Treat.* 2020:1-7.
160. Giuntoli M, Bonicoli E, Bugelli G, Valesini M, Manca M, Scaglione M. Lessons learnt from COVID 19: An Italian multicentric epidemiological study of orthopaedic and trauma services. *J Clin Orthop Trauma.* 2020;11(4):721-7.
161. Glauser G, Wathen C, Miranda SP, Blue R, Dimentberg R, Welch WC, et al. Letter to the Editor Regarding "Implementation and Workflow of a Telehealth Clinic in Neurosurgery During the COVID-19 Pandemic". *World Neurosurg.* 2020;139:373-5.
162. Glazier RH, Green ME, Wu FC, Frymire E, Kopp A, Kiran T. Shifts in office and virtual primary care during the early COVID-19 pandemic in Ontario, Canada. *Cmaj.* 2021;193(6):E200-E10.
163. Goksoy B, Akca MT, Inanc OF. The impacts of the COVID-19 outbreak on emergency department visits of surgical patients. *Ulus Travma Acil Cerrahi Derg.* 2020;26(5):685-92.
164. Goldenberg MN, Parwani V. Psychiatric emergency department volume during Covid-19 pandemic. *Am J Emerg Med.* 2021;41:233-4.
165. Goldman DT, Sharma H, Finkelstein M, Carlon T, Marinelli B, Doshi AH, et al. The Role of Telemedicine in the Maintenance of IR Outpatient Evaluation and Management Volume During the COVID-19 Global Pandemic. *J Vasc Interv Radiol.* 2021;32(3):479-81.
166. Goldman RD, Grafstein E, Barclay N, Irvine MA, Portales-Casamar E. Paediatric patients seen in 18 emergency departments during the COVID-19 pandemic. *Emerg Med J.* 2020;37(12):773-7.
167. Gomes CM, Favorito LA, Henriques JVT, Canalini AF, Anzolch KMJ, de Carvalho Fernandes R, et al. Impact of COVID-19 on clinical practice, income, health and lifestyle behavior of Brazilian urologists. *Int Braz J Urol.* 2020;46(6):1042-71.

168. Goncalves-Pinho M, Mota P, Ribeiro J, Macedo S, Freitas A. The Impact of COVID-19 Pandemic on Psychiatric Emergency Department Visits - A Descriptive Study. *Psychiatr Q.* 2021;92(2):621-31.
169. Gonzalez HA, Myers S, Whitehead E, Pattinson A, Stamp K, Turnbull J, et al. React, reset and restore: Adaptation of a large inflammatory bowel disease service during COVID-19 pandemic. *Clin Med (Lond).* 2020;20(5):e183-e8.
170. Gormeli Kurt N, Gunes C. How has Covid-19 pandemic affected crowded emergency services? *Int J Clin Pract.* 2020;74(12):e13624.
171. Graell M, Moron-Nozaleda MG, Camarneiro R, Villasenor A, Yanez S, Munoz R, et al. Children and adolescents with eating disorders during COVID-19 confinement: Difficulties and future challenges. *Eur Eat Disord Rev.* 2020;28(6):864-70.
172. Graulich T, Gerhardy J, Graff P, Orgel M, Omar Pacha T, Krettek C, et al. [Patient volume, diagnosis and injury mechanisms in a level 1 trauma center at the beginning of the COVID-19 pandemic in comparison to the mean of the 3 previous years : A retrospective, epidemiological evaluation of 4967 patients]. *Unfallchirurg.* 2020;123(11):862-9.
173. Gravas S, Bolton D, Gomez R, Klotz L, Kulkarni S, Tanguay S, et al. Impact of COVID-19 on Urology Practice: A Global Perspective and Snapshot Analysis. *J Clin Med.* 2020;9(6):1-8.
174. Grech V, Borg D, Agius S, Scherb H. WITHDRAWN: Sharp decline in acute and elective hospital attendances and admissions due to COVID-19 in Malta (Q1 2020) - A population-based study. *Early Hum Dev.* 2020:105250.
175. Griffith AM, Ockerse P, Shaaban A, Kelly C. Effect of the COVID-19 pandemic on CT scans ordered from the emergency department for abdominal complaints. *Emerg Radiol.* 2021;28(3):485-95.
176. Grippaudo FR, Migliano E, Redi U, Turriziani G, Marino D, D'Ermo G, et al. The impact of COVID-19 in plastic surgery departments: a comparative retrospective study in a COVID-19 and in a non-COVID-19 hospital. *Eur J Plast Surg.* 2020;43(5):1-6.
177. Grossman Z, Chodick G, Reingold SM, Chapnick G, Ashkenazi S. The future of telemedicine visits after COVID-19: perceptions of primary care pediatricians. *Isr J Health Policy Res.* 2020;9(1):53.
178. Grover S, Mehra A, Sahoo S, Avasthi A, Tripathi A, D'Souza A, et al. Impact of COVID-19 pandemic and lockdown on the state of mental health services in the private sector in India. *Indian J Psychiatry.* 2020;62(5):488-93.
179. Guo H, Zhou Y, Liu X, Tan J. The impact of the COVID-19 epidemic on the utilization of emergency dental services. *J Dent Sci.* 2020;15(4):564-7.
180. Guven DC, Aktas BY, Aksun MS, Ucgul E, Sahin TK, Yildirim HC, et al. COVID-19 pandemic: changes in cancer admissions. *BMJ Support Palliat Care.* 2020;14:14.
181. Ham CH, Moon HJ, Kim JH, Park YK, Lee TH, Kwon WK. Coronavirus Disease (COVID-19) Outbreak and Its Impact on Spinal Daily Practice : Preliminary Report from a Single (Regional) University Hospital in Republic of Korea. *J Korean Neurosurg Soc.* 2020;63(4):407-14.
182. Hampton M, Clark M, Baxter I, Stevens R, Flatt E, Murray J, et al. The effects of a UK lockdown on orthopaedic trauma admissions and surgical cases: A multicentre comparative study. *Bone Jt Open.* 2020;1(5):137-43.
183. Hartnett KP, Kite-Powell A, DeVies J, Coletta MA, Boehmer TK, Adjemian J, et al. Impact of the COVID-19 Pandemic on Emergency Department Visits - United States, January 1, 2019-May 30, 2020. *MMWR Morb Mortal Wkly Rep.* 2020;69(23):699-704.
184. Hashmi A, Parikh K, Al-Natour M, Azar N, Sutter C, Ramaiya N, et al. Interventional radiology procedural volume changes during COVID-19 initial phase: A tertiary level Midwest health system experience. *Clin Imaging.* 2021;72:31-6.
185. Haskel JD, Lin CC, Kaplan DJ, Dankert JF, Merkow D, Crespo A, et al. Hip Fracture Volume Does Not Change at a New York City Level 1 Trauma Center During a Period of Social Distancing. *Geriatr Orthop Surg Rehabil.* 2020;11:2151459320972674.
186. Hassan K, Prescher H, Wang F, Chang DW, Reid RR. Evaluating the Effects of COVID-19 on Plastic Surgery Emergencies: Protocols and Analysis From a Level I Trauma Center. *Ann Plast Surg.* 2020;85(2S Suppl 2):S161-S5.

187. Hattenbach LO, Heinz P, Feltgen N, Hoerauf H, Kohnen T, Priglinger S, et al. [Impacts of the SARS-CoV-2 pandemic on ophthalmic care in Germany]. *Ophthalmologe*. 2020;117(9):892-904.
188. Hautz WE, Sauter TC, Exadaktylos AK, Krummrey G, Schaubert S, Muller M. Barriers to seeking emergency care during the COVID-19 pandemic may lead to higher morbidity and mortality - a retrospective study from a Swiss university hospital. *Swiss Med Wkly*. 2020;150:w20331.
189. Heidemann CS, Garbe J, Damm M, Walter S, Michl P, Rosendahl J, et al. German bronchoscopy unit readiness for the COVID-19 pandemic: a nationwide survey. *ERJ open res*. 2020;6(3):1-6.
190. Hemingway JF, Singh N, Starnes BW. Emerging practice patterns in vascular surgery during the COVID-19 pandemic. *J Vasc Surg*. 2020;72(2):396-402.
191. Hendrikse C, Parak M, Van Hoving DJ. A descriptive analysis of the effect of the national COVID-19 lockdown on the workload and case mix of patients presenting to a district-level emergency centre in Cape Town, South Africa. *S Afr Med J*. 2020;110(11):1113-8.
192. Herring AA, Kalmin M, Speener M, Goodman-Meza D, Snyder H, Campbell A, et al. Sharp decline in hospital and emergency department initiated buprenorphine for opioid use disorder during COVID-19 state of emergency in California. *J Subst Abuse Treat*. 2021;123:108260.
193. Holland KM, Jones C, Vivolo-Kantor AM, Idaikkadar N, Zwald M, Hoots B, et al. Trends in US Emergency Department Visits for Mental Health, Overdose, and Violence Outcomes Before and During the COVID-19 Pandemic. *JAMA Psychiatry*. 2021;78(4):372-9.
194. Houshyar R, Tran-Harding K, Glavis-Bloom J, Nguyentat M, Mongan J, Chahine C, et al. Effect of shelter-in-place on emergency department radiology volumes during the COVID-19 pandemic. *Emerg Radiol*. 2020;27(6):781-4.
195. Hoyer C, Ebert A, Szabo K, Platten M, Meyer-Lindenberg A, Kranaster L. Decreased utilization of mental health emergency service during the COVID-19 pandemic. *Eur Arch Psychiatry Clin Neurosci*. 2021;271(2):377-9.
196. Hoz SS, Al-Sharshahi ZF, Dolachee AA, Matti WE. Letter to the Editor: "Beyond Containment: Tracking the Impact of Coronavirus Disease 2019 (COVID-19) on Neurosurgery Services in Iraq". *World Neurosurg*. 2020;143:619-20.
197. Hubner M, Zingg T, Martin D, Eckert P, Demartines N. Surgery for non-Covid-19 patients during the pandemic. *PLoS ONE*. 2020;15(10):e0241331.
198. Hughes HE, Hughes TC, Morbey R, Challen K, Oliver I, Smith GE, et al. Emergency department use during COVID-19 as described by syndromic surveillance. *Emerg Med J*. 2020;37(10):600-4.
199. Ibrahim LS, Venables ZC, Levell NJ. The impact of COVID-19 on dermatology outpatient services in England in 2020. *Clin Exp Dermatol*. 2021;46(2):377-8.
200. Iezzi R, Valente I, Cina A, Posa A, Contegiacomo A, Alexandre A, et al. Longitudinal study of interventional radiology activity in a large metropolitan Italian tertiary care hospital: how the COVID-19 pandemic emergency has changed our activity. *Eur Radiol*. 2020;30(12):6940-9.
201. Imamura R, Bento RF, Matos LL, William WN, Jr., Marta GN, Chaves ALF, et al. Impact of the COVID-19 Pandemic on Physicians Working in the Head and Neck Field. *Int Arch Otorhinolaryngol*. 2021;25(1):e150-e9.
202. Iozzi L, Brambilla I, Foadelli T, Marseglia GL, Ciprandi G. Paediatric emergency department visits fell by more than 70% during the COVID-19 lockdown in Northern Italy. *Acta Paediatr*. 2020;109(10):2137-8.
203. Isba R, Edge R, Auerbach M, Cicero MX, Jenner R, Setzer E, et al. COVID-19: Transatlantic Declines in Pediatric Emergency Admissions. *Pediatr Emerg Care*. 2020;36(11):551-3.
204. Isba R, Edge R, Jenner R, Broughton E, Francis N, Butler J. Where have all the children gone? Decreases in paediatric emergency department attendances at the start of the COVID-19 pandemic of 2020. *Arch Dis Child*. 2020;105(7):704.
205. Ishikawa Y, Hifumi T, Otani N, Miyamichi R, Urashima M, Takeda S, et al. Relationship Between the Number of Patients Visiting Emergency Department and Tokyo Health System's Capacity During Early Stages of the First Wave of COVID-19. *SN Compr Clin Med*. 2020:1-3.



206. Isoletta E, Vassallo C, Brazzelli V, Giorgini C, Tomasini CF, Sabena A, et al. Emergency accesses in Dermatology Department during the Covid-19 pandemic in a referral third level center in the north of Italy. *Dermatol Ther*. 2020;33(6):e14027.
207. Jain A, Croghan SM, Kelly C, Scanlon L, Daniels AE, Fitzgibbon L, et al. The Early Impact of COVID-19 on Urological Service Provision. *Ir Med J*. 2020;113(8):157.
208. Jang KM, Ahn JY, Choi HJ, Lee S, Kim D, Lee DW, et al. Pediatric Emergency Department Utilization and Coronavirus Disease in Daegu, Korea. *J Korean Med Sci*. 2021;36(1):e11.
209. Jeffery MM, D'Onofrio G, Paek H, Platts-Mills TF, Soares WE, 3rd, Hoppe JA, et al. Trends in Emergency Department Visits and Hospital Admissions in Health Care Systems in 5 States in the First Months of the COVID-19 Pandemic in the US. *JAMA Intern Med*. 2020;180(10):1328-33.
210. Jereczek-Fossa BA, Palazzi MF, Soatti CP, Cazzaniga LF, Ivaldi GB, Pepa M, et al. COVID-19 Outbreak and Cancer Radiotherapy Disruption in Lombardy, Northern Italy. *Clin Oncol (R Coll Radiol)*. 2020;32(7):e160-e1.
211. Jereczek-Fossa BA, Pepa M, Marvaso G, Bruni A, Buglione di Monale EBM, Catalano G, et al. COVID-19 outbreak and cancer radiotherapy disruption in Italy: Survey endorsed by the Italian Association of Radiotherapy and Clinical Oncology (AIRO). *Radiother Oncol*. 2020;149:89-93.
212. Jesenšek Pape ZB, SoSi CL, Bojnec V. The consequences of COVID-19 outbreak on outpatient rehabilitation services: a single-centre experience in Slovenia. *Eur J Phys Rehabil Med*. 2021;04:04.
213. Jimenez-Blanco Bravo M, Cordero Pereda D, Sanchez Vega D, Del Prado Diaz S, Monteagudo Ruiz JM, Zamorano Gomez JL, et al. Heart Failure in the Time of COVID-19. *Cardiology*. 2020;145(8):481-4.
214. Johnson KG, Sullivan SS, Nti A, Rastegar V, Gurubhagavatula I. The impact of the COVID-19 pandemic on sleep medicine practices. *J Clin Sleep Med*. 2021;17(1):79-87.
215. Joy M, McGagh D, Jones N, Liyanage H, Sherlock J, Parimalanathan V, et al. Reorganisation of primary care for older adults during COVID-19: a cross-sectional database study in the UK. *Br J Gen Pract*. 2020;70(697):e540-e7.
216. Joyce AA, Conger A, McCormick ZL, Kendall RW, Wagner G, Teramoto M, et al. Changes in Interventional Pain Physician Decision-Making, Practice Patterns, and Mental Health During the Early Phase of the SARS-CoV-2 Global Pandemic. *Pain Med*. 2020;21(12):3585-95.
217. Justman N, Shahak G, Gutzeit O, Ben Zvi D, Ginsberg Y, Solt I, et al. Lockdown with a Price: The impact of the COVID-19 Pandemic on Prenatal Care and Perinatal Outcomes in a Tertiary Care Center. *Isr Med Assoc J*. 2020;22(9):533-7.
218. Kachroo N, Wright HC, Sivalingam S. A Tale of Two Eras: The Effect of the COVID-19 Pandemic on Stone Disease Presentations. *Urology*. 2020;144:270-2.
219. Kale NN, Patel AH, Leddy MJ, 3rd, Savoie FH, 3rd, Sherman WF. The Effect of COVID-19 on Orthopedic Practices and Surgeons in Louisiana. *Orthopedics*. 2020;43(6):351-5.
220. Kam AW, Chaudhry SG, Gunasekaran N, White AJ, Vukasovic M, Fung AT. Fewer presentations to metropolitan emergency departments during the COVID-19 pandemic. *Med J Aust*. 2020;213(8):370-1.
221. Kara M, Akduman B, Isik YM, Gursoy K, Kocer U. Impact of COVID-19 outbreak on plastic surgery: Taken precautions, distribution of surgical procedures and changes in admissions to outpatient clinic. *J Plast Reconstr Aesthet Surg*. 2021;74(4):890-930.
222. Karacin C, Acar R, Bal O, Eren T, Sendur MAN, Acikgoz Y, et al. "Swords and Shields" against COVID-19 for patients with cancer at "clean" and "pandemic" hospitals: are we ready for the second wave? *Support Care Cancer*. 2021;22:22.
223. Karakasi MV, Zaoutsou A, Theofilidis A, Ierodiakonou-Benou I, Nasika Z, Nimatoudis I. Impact of the SARS-CoV-2 pandemic on psychiatric emergencies in northern Greece: Preliminary study on a sample of the Greek population. *Psychiatry Clin Neurosci*. 2020;74(11):613-5.

224. Kartal SP, Celik G, Sendur N, Aytekin S, Serdaroglu S, Dogan B, et al. Multicenter study evaluating the impact of COVID-19 outbreak on dermatology outpatients in Turkey. *Dermatol Ther.* 2020;33(6):e14485.
225. Kasle DA, Torabi SJ, Savoca EL, Judson BL, Manes RP. Outpatient Otolaryngology in the Era of COVID-19: A Data-Driven Analysis of Practice Patterns. *Otolaryngol Head Neck Surg.* 2020;163(1):138-44.
226. Kastritis E, Tsitsimpis K, Anninos E, Stamatelopoulos K, Kanakakis I, Lampropoulos C, et al. Significant reduction in the visits to the emergency room department during the COVID-19 pandemic in a tertiary hospital in Greece: Indirect victims of the pandemic? *Medicine (Baltimore).* 2020;99(52):e23845.
227. Katz SE, Spencer H, Zhang M, Banerjee R. Impact of the COVID-19 Pandemic on Infectious Diagnoses and Antibiotic Use in Pediatric Ambulatory Practices. *J Pediatric Infect Dis Soc.* 2021;10(1):62-4.
228. Kayastha SR, Parajuli B, Basi A, Shrestha D. Orthopaedic Services during Nationwide COVID-19 Lockdown: Dhulikhel Hospital, Kathmandu University Hospital Experience and Review of Literature. *Kathmandu Univ Med J (KUMJ).* 2020;18(70):29-35.
229. Keays G, Friedman D, Gagnon I. Injuries in the time of COVID-19. *Health Promot Chronic Dis Prev Can.* 2020;40(11-12):336-41.
230. Kennedy NA, Hansen R, Younge L, Mawdsley J, Beattie RM, Din S, et al. Organisational changes and challenges for inflammatory bowel disease services in the UK during the COVID-19 pandemic. *Frontline gastroenterol.* 2020;11(5):343-50.
231. Kenyon CC, Hill DA, Henrickson SE, Bryant-Stephens TC, Zorc JJ. Initial effects of the COVID-19 pandemic on pediatric asthma emergency department utilization. *J Allergy Clin Immunol Pract.* 2020;8(8):2774-6 e1.
232. Keyes D, Hardin B, Sweeney B, Shedden K. Change in urban and non-urban pattern of ED use during the COVID-19 pandemic in 28 Michigan hospitals: an observational study. *BMJ Open.* 2021;11(2):e043024.
233. Khalafallah AM, Jimenez AE, Lee RP, Weingart JD, Theodore N, Cohen AR, et al. Impact of COVID-19 on an Academic Neurosurgery Department: The Johns Hopkins Experience. *World Neurosurg.* 2020;139:e877-e84.
234. Khan H, Williamson M, Trompeter A. The impact of the COVID-19 pandemic on orthopaedic services and training in the UK. *Eur J Orthop Surg Traumatol.* 2021;31(1):105-9.
235. Khurana DK, Raheja SG, Dayal M, Pande D, Ganapathy U. COVID 19: The New Normal in the Clinic: Overcoming Challenges in Palliative Care. *Indian J Palliat Care.* 2020;26(Suppl 1):S81-S5.
236. Kim HS, Cruz DS, Conrardy MJ, Gandhi KR, Seltzer JA, Loftus TM, et al. Emergency Department Visits for Serious Diagnoses During the COVID-19 Pandemic. *Acad Emerg Med.* 2020;27(9):910-3.
237. Kiong KL, Guo T, Yao C, Gross ND, Hanasono MM, Ferrarotto R, et al. Changing practice patterns in head and neck oncologic surgery in the early COVID-19 era. *Head Neck.* 2020;42(6):1179-86.
238. Komatsu H, Banno K, Yanaihara N, Kimura T, Board Members of Japan Society of O, Gynecology. Prevention and practice during the COVID-19 emergency declaration period in Japanese obstetrical/gynecological facilities. *J Obstet Gynaecol Res.* 2020;46(11):2237-41.
239. Konig S, Ueberham L, Pellissier V, Hohenstein S, Meier-Hellmann A, Thiele H, et al. Hospitalization deficit of in- and outpatient cases with cardiovascular diseases and utilization of cardiological interventions during the COVID-19 pandemic: Insights from the German-wide helios hospital network. *Clin Cardiol.* 2021;44(3):392-400.
240. Kowalski LP, Imamura R, Castro Junior G, Marta GN, Chaves ALF, Matos LL, et al. Effect of the COVID-19 Pandemic on the Activity of Physicians Working in the Areas of Head and Neck Surgery and Otorhinolaryngology. *Int Arch Otorhinolaryngol.* 2020;24(3):e258-e66.
241. Kratochvil D, Hill H, Moylan S. The impact of Stage 3 COVID-19 lockdown on psychiatric presentations at a regional Victorian emergency department. *Australas Psychiatry.* 2021;29(1):105-6.
242. Kriegmair MC, Speck T, Schneider AW, Volkmer B, Michel MS. [Urological care in practices and clinics during the corona virus pandemic in Germany]. *Urologe A.* 2021;60(3):318-30.



243. Kristoffersen ES, Faiz KW, Sandset EC, Storstein AM, Stefansen S, Winsvold BS, et al. Hospital-based headache care during the Covid-19 pandemic in Denmark and Norway. *J Headache Pain*. 2020;21(1):128.
244. Krug S, Garbe J, Konig S, Ungewiss H, Michl P, Rinke A, et al. Professional Assessment of the Impact of COVID-19 on Handling NET Patients. *J Clin Med*. 2020;9(11):11.
245. Kuitunen I, Artama M, Makela L, Backman K, Heiskanen-Kosma T, Renko M. Effect of Social Distancing Due to the COVID-19 Pandemic on the Incidence of Viral Respiratory Tract Infections in Children in Finland During Early 2020. *Pediatr Infect Dis J*. 2020;39(12):e423-e7.
246. Kuitunen I, Ponkilainen VT, Launonen AP, Reito A, Hevonkorpi TP, Paloneva J, et al. The effect of national lockdown due to COVID-19 on emergency department visits. *Scand J Trauma Resusc Emerg Med*. 2020;28(1):114.
247. Kushnir VM, Berzin TM, Elmunzer BJ, Mendelsohn RB, Patel V, Pawa S, et al. Plans to Reactivate Gastroenterology Practices Following the COVID-19 Pandemic: A Survey of North American Centers. *Clin Gastroenterol Hepatol*. 2020;18(10):2287-94 e1.
248. Kutlu O, Gunes R, Coerd K, Metin A, Khachemoune A. The effect of the "stay-at-home" policy on requests for dermatology outpatient clinic visits after the COVID-19 outbreak. *Dermatol Ther*. 2020;33(4):e13581.
249. Kutlu O, Metin A. Relative changes in the pattern of diseases presenting in dermatology outpatient clinic in the era of the COVID-19 pandemic. *Dermatol Ther*. 2020;33(6):e14096.
250. Kutluk MT, Ahmed F, Kirazli M, Bajin IY, Mungen E, Ekinci S, et al. The effect of the COVID-19 pandemic on paediatric cancer care: lessons learnt from a major paediatric oncology department in Turkey. *Ecancermedicalscience*. 2021;15:1172.
251. Kvolik Pavic A, Zubcic V, Kvolik S. Workload changes during the COVID-19 pandemic and effects on the flow of cancer patients in the Maxillofacial Surgery Department. *Med Glas (Zenica)*. 2021;18(1):133-7.
252. Lacson R, Shi J, Kapoor N, Eappen S, Boland GW, Khorasani R. Exacerbation of Inequities in Use of Diagnostic Radiology During the Early Stages of Reopening After COVID-19. *J Am Coll Radiol*. 2021;18(5):696-703.
253. Lampe C, Dionisi-Vici C, Bellettato CM, Paneghetti L, van Lingen C, Bond S, et al. The impact of COVID-19 on rare metabolic patients and healthcare providers: results from two MetabERN surveys. *Orphanet J Rare Dis*. 2020;15(1):341.
254. Lancaster EM, Wu B, Iannuzzi J, Oskowitz A, Gasper W, Vartanian S, et al. Impact of the coronavirus disease 2019 pandemic on an academic vascular practice and a multidisciplinary limb preservation program. *J Vasc Surg*. 2020;72(6):1850-5.
255. Lateef F. The Impact of the COVID 19 Pandemic on Emergency Department Attendance: What Seems To Be Keeping the Patients Away? *J Emerg Trauma Shock*. 2020;13(4):246-51.
256. Lazaridis, II, Kraljevic M, Schneider R, Klasen JM, Schizas D, Peterli R, et al. The Impact of the COVID-19 Pandemic on Bariatric Surgery: Results from a Worldwide Survey. *Obes Surg*. 2020;30(11):4428-36.
257. Lazzzerini M, Barbi E, Apicella A, Marchetti F, Cardinale F, Trobia G. Delayed access or provision of care in Italy resulting from fear of COVID-19. *Lancet Child Adolesc Health*. 2020;4(5):e10-e1.
258. Lee ATC, Mo FYM, Lam LCW. Higher psychogeriatric admissions in COVID-19 than in severe acute respiratory syndrome. *Int J Geriatr Psychiatry*. 2020;35(12):1449-57.
259. Lee KD, Lee SB, Lim JK, Kang YM, Kim IB, Moon HJ, et al. Providing essential clinical care for non-COVID-19 patients in a Seoul metropolitan acute care hospital amidst ongoing treatment of COVID-19 patients. *J Hosp Infect*. 2020;106(4):673-7.
260. Lee S, Lim AR, Kim MJ, Choi YJ, Kim JW, Park KH, et al. Innovative countermeasures can maintain cancer care continuity during the coronavirus disease-2019 pandemic in Korea. *Eur J Cancer*. 2020;136:69-75.
261. Leeb RT, Bitsko RH, Radhakrishnan L, Martinez P, Njai R, Holland KM. Mental Health-Related Emergency Department Visits Among Children Aged <18 Years During the COVID-19 Pandemic - United States, January 1-October 17, 2020. *MMWR Morb Mortal Wkly Rep*. 2020;69(45):1675-80.

262. Leff RA, Setzer E, Cicero MX, Auerbach M. Changes in pediatric emergency department visits for mental health during the COVID-19 pandemic: A cross-sectional study. *Clin Child Psychol Psychiatry*. 2021;26(1):33-8.
263. Legrottaglie EF, Balia L, Camesasca FI, Vallejo-Garcia JL, Fossati G, Vinciguerra R, et al. Management of an ophthalmology department during COVID-19 pandemic in Milan, Italy. *Eur J Ophthalmol*. 2020;1120672120960334.
264. Leis M, Fleming P, Lynde CW. Impacts of COVID-19 on Dermatologic Practice, Disease Presentation, and Immunomodulator Prescriptions. *J Cutan Med Surg*. 2021;25(1):106-8.
265. Leong AZ, Lim JX, Tan CH, Teo K, Nga VDW, Lwin S, et al. COVID-19 response measures - a Singapore Neurosurgical Academic Medical Centre experience segregated team model to maintain tertiary level neurosurgical care during the COVID-19 outbreak. *Br J Neurosurg*. 2020:1-6.
266. Leow SH, Dean W, MacDonald-Nethercott M, MacDonald-Nethercott E, Boyle AA. The Attend Study: A Retrospective Observational Study of Emergency Department Attendances During the Early Stages of the COVID-19 Pandemic. *Cureus*. 2020;12(7):e9328.
267. Leti Acciaro A, Montanari S, Venturelli M, Starnoni M, Adani R. Retrospective study in clinical governance and financing system impacts of the COVID-19 pandemic in the hand surgery and microsurgery HUB center. *Musculoskelet Surg*. 2021;02:02.
268. Levene R, Fein DM, Silver EJ, Joels JR, Khine H. The ongoing impact of COVID-19 on asthma and pediatric emergency health-seeking behavior in the Bronx, an epicenter. *Am J Emerg Med*. 2021;43:109-14.
269. Lewicki P, Basourakos SP, Al Awamlh BAH, Wu X, Hu JC, Schlegel PN, et al. Estimating the Impact of COVID-19 on Urology: Data from a Large Nationwide Cohort. *Eur Urol Open Sci*. 2021;25:52-6.
270. Li WS, Heng DL, Chia TH, Lim EC, Tan EK. High Outpatient Attendance During COVID-19 Lockdown When Patients Were Given the Option to Return. *Mov Disord*. 2020;35(12):2137-8.
271. Liao CT, Chen ZC, Chang WT. The Impact of COVID-19 on Elective Cardiovascular Procedures in Taiwan - A Single-Center Experience. *Acta Cardiol Sin*. 2021;37(1):97-9.
272. Liebensteiner MC, Khosravi I, Hirschmann MT, Heuberer PR, Board of the AGASoA, Joint S, et al. Massive cutback in orthopaedic healthcare services due to the COVID-19 pandemic. *Knee Surg Sports Traumatol Arthrosc*. 2020;28(6):1705-11.
273. Liguoro I, Pilotto C, Vergine M, Pusiol A, Vidal E, Cogo P. The impact of COVID-19 on a tertiary care pediatric emergency department. *Eur J Pediatr*. 2021;180(5):1497-504.
274. Lim ZV, Lim YL. Impact of COVID-19 on Clinical Operations and Management of Patients in a Singapore Immunodermatology Unit during the 'Circuit-Breaker' Period and Beyond. *Ann Acad Med Singap*. 2020;49(11):919-21.
275. Lima EBS, Belangero PS, Falotico GG, Mansur NSB, Luzo MVM, Reis FBD. Intervention Protocol of the Orthopedics and Traumatology Department of a High-Complexity University Hospital to Cope with the COVID-19 Pandemic. *Rev Bras Ortop (Sao Paulo)*. 2020;55(3):269-77.
276. Lin CF, Huang YH, Cheng CY, Wu KH, Tang KS, Chiu IM. Public Health Interventions for the COVID-19 Pandemic Reduce Respiratory Tract Infection-Related Visits at Pediatric Emergency Departments in Taiwan. *Front Public Health*. 2020;8:604089.
277. Lin MH, Hsu JL, Chen TJ, Hwang SJ. Impact of the COVID-19 pandemic on the use of advance care planning services within the veterans administration system in Taiwan. *J Chin Med Assoc*. 2021;84(2):197-202.
278. Litchman GH, Rigel DS. The immediate impact of COVID-19 on US dermatology practices. *J Am Acad Dermatol*. 2020;83(2):685-6.
279. Lopez-Bravo A, Garcia-Azorin D, Belvis R, Gonzalez-Oria C, Latorre G, Santos-Lasaosa S, et al. Impact of the COVID-19 pandemic on headache management in Spain: an analysis of the current situation and future perspectives. *Neurologia (Engl Ed)*. 2020;35(6):372-80.

280. Lubrano R, Villani A, Berrettini S, Caione P, Chiara A, Costantino A, et al. Point of view of the Italian pediatric scientific societies about the pediatric care during the COVID-19 lockdown: what has changed and future prospects for restarting. *Ital J Pediatr.* 2020;46(1):142.
281. Luceri F, Morelli I, Accetta R, Mangiavini L, Maffulli N, Peretti GM. Italy and COVID-19: the changing patient flow in an orthopedic trauma center emergency department. *J Orthop Surg Res.* 2020;15(1):323.
282. Lucero AD, Lee A, Hyun J, Lee C, Kahwaji C, Miller G, et al. Underutilization of the Emergency Department During the COVID-19 Pandemic. *West J Emerg Med.* 2020;21(6):15-23.
283. Luciani LG, Mattevi D, Cai T, Giusti G, Proietti S, Malossini G. Teleurology in the Time of Covid-19 Pandemic: Here to Stay? *Urology.* 2020;140:4-6.
284. Lundberg A, Hillebrecht AL, McKenna G, Srinivasan M. COVID-19: Impacts on oral healthcare delivery in dependent older adults. *Gerodontology.* 2021;38(2):174-8.
285. Luo Z, Li S, Li N, Li Y, Zhang Y, Cao Z, et al. Assessment of Pediatric Outpatient Visits for Notifiable Infectious Diseases in a University Hospital in Beijing During COVID-19. *JAMA Netw Open.* 2020;3(8):e2019224.
286. Ma SH, Tai YH, Dai YX, Chen CC, Chen TJ, Chang YT. Impact of the COVID-19 pandemic on dermatology clinic visits: Experience from a tertiary medical center in Taiwan. *Dermatologica Sinica.* 2020;38(3):180-1.
287. MacDonald CW, Lonnemann E, Petersen SM, Rivett DA, Osmotherly PG, Brismee JM. COVID 19 and manual therapy: international lessons and perspectives on current and future clinical practice and education. *J Man Manip Ther.* 2020;28(3):134-45.
288. Macy ML, Huettman P, Kan K. Changes in Primary Care Visits in the 24 Weeks After COVID-19 Stay-at-Home Orders Relative to the Comparable Time Period in 2019 in Metropolitan Chicago and Northern Illinois. *J Prim Care Community Health.* 2020;11:2150132720969557.
289. Madanelo M, Ferreira C, Nunes-Carneiro D, Pinto A, Rocha MA, Correia J, et al. The impact of the coronavirus disease 2019 pandemic on the utilisation of emergency urological services. *BJU Int.* 2020;126(2):256-8.
290. Madhuripan N, Cheung HMC, Alicia Cheong LH, Jawahar A, Willis MH, Larson DB. Variables Influencing Radiology Volume Recovery During the Next Phase of the Coronavirus Disease 2019 (COVID-19) Pandemic. *J Am Coll Radiol.* 2020;17(7):855-64.
291. Maida M, Sferrazza S, Savarino E, Ricciardiello L, Repici A, Morisco F, et al. Impact of the COVID-19 pandemic on Gastroenterology Divisions in Italy: A national survey. *Dig Liver Dis.* 2020;52(8):808-15.
292. Malhotra A, Wu X, Fleishon HB, Duszak R, Jr., Silva E, 3rd, McGinty GB, et al. Initial Impact of COVID-19 on Radiology Practices: An ACR/RBMA Survey. *J Am Coll Radiol.* 2020;17(11):1525-31.
293. Mallick I, Chakraborty S, Baral S, Saha S, Lal VH, Sasidharan R, et al. Prioritizing Delivery of Cancer Treatment During a COVID-19 Lockdown: The Experience of a Clinical Oncology Service in India. *JCO Glob Oncol.* 2021;7:99-107.
294. Maniscalco P, Ciatti C, Gattoni S, Puma Pagliarello C, Moretti G, Cauteruccio M, et al. The impact of COVID-19 pandemic on the Emergency Room and Orthopedic Departments in Piacenza: a retrospective analysis. *Acta Biomed.* 2020;91(14-S):e2020028.
295. Mann JA, Patel N, Bragg J, Roland D. Did children 'stay safe'? Evaluation of burns presentations to a children's emergency department during the period of COVID-19 school closures. *Arch Dis Child.* 2021;106(3):e18.
296. Maqueda Gonzalez R, Cerdan Santacruz C, Garcia Septiem J, Blanco Teres L, Lopesino Gonzalez JM, Fernandez Jimenez G, et al. Proctologic emergency consultation during COVID-19: Comparative cross-sectional cohort study. *Cir Esp (Engl Ed).* 2020.
297. Marasco G, Nardone OM, Maida M, Boskoski I, Pastorelli L, Scaldaferrri F, et al. Impact of COVID-19 outbreak on clinical practice and training of young gastroenterologists: A European survey. *Dig Liver Dis.* 2020;52(12):1396-402.

298. Markeson D, Freeman Romilly N, Potter M, Tucker S, Kalu P. Restarting plastic surgery: Drawing on the experience of the initial COVID-19 pandemic to inform the safe resumption of services. *J Plast Reconstr Aesthet Surg*. 2020;73(12):2121-6.
299. Martinho FC, Griffin IL. A Cross-sectional Survey on the Impact of Coronavirus Disease 2019 on the Clinical Practice of Endodontists across the United States. *J Endod*. 2021;47(1):28-38.
300. Matera L, Nenna R, Rizzo V, Ardeni Morini F, Banderali G, Calvani M, et al. SARS-CoV-2 Pandemic Impact on Pediatric Emergency Rooms: A Multicenter Study. *Int J Environ Res Public Health*. 2020;17(23):25.
301. Mauri E, Abati E, Musumeci O, Rodolico C, D'Angelo MG, Mirabella M, et al. Estimating the impact of COVID-19 pandemic on services provided by Italian Neuromuscular Centers: an Italian Association of Myology survey of the acute phase. *Acta Myol*. 2020;39(2):57-66.
302. Mauro V, Lorenzo M, Paolo C, Sergio H. Treat all COVID 19-positive patients, but do not forget those negative with chronic diseases. *Intern Emerg Med*. 2020;15(5):787-90.
303. Mayol J, Artucio C, Batista I, Puentes A, Villegas J, Quizpe R, et al. An international survey in Latin America on the practice of interventional cardiology during the COVID-19 pandemic, with a particular focus on myocardial infarction. *Neth Heart J*. 2020;28(7-8):424-30.
304. Mazzatenta D, Zoli M, Cavallo MA, Ferro S, Giombelli E, Pavesi G, et al. Remodulation of neurosurgical activities in an Italian region (Emilia-Romagna) under COVID- 19 emergency: maintaining the standard of care during the crisis. *J Neurosurg Sci*. 2020.
305. McDonnell T, Nicholson E, Conlon C, Barrett M, Cummins F, Hensey C, et al. Assessing the Impact of COVID-19 Public Health Stages on Paediatric Emergency Attendance. *Int J Environ Res Public Health*. 2020;17(18):15.
306. McGinley MP, Ontaneda D, Wang Z, Weber M, Shook S, Stanton M, et al. Teleneurology as a Solution for Outpatient Care During the COVID-19 Pandemic. *Telemed J E Health*. 2020;26(12):1537-9.
307. Messina C, Buzzoni AC, Gitto S, Almolla J, Albano D, Sconfienza LM. Disruption of bone densitometry practice in a Northern Italy Orthopedic Hospital during the COVID-19 pandemic. *Osteoporos Int*. 2021;32(1):199-203.
308. Meyer R, Levin G, Hendin N, Katorza E. Impact of the COVID-19 Outbreak on Routine Obstetrical Management. *Isr Med Assoc J*. 2020;22(8):483-8.
309. Michalowsky B, Hoffmann W, Bohlken J, Kostev K. Effect of the COVID-19 lockdown on disease recognition and utilisation of healthcare services in the older population in Germany: a cross-sectional study. *Age Ageing*. 2021;50(2):317-25.
310. Migliori GB, Thong PM, Akkerman O, Alffenaar JW, Alvarez-Navascues F, Assao-Neino MM, et al. Worldwide Effects of Coronavirus Disease Pandemic on Tuberculosis Services, January-April 2020. *Emerg Infect Dis*. 2020;26(11):2709-12.
311. Miller MJ, Xu L, Qin J, Hahn EE, Ngo-Metzger Q, Mittman B, et al. Impact of COVID-19 on Cervical Cancer Screening Rates Among Women Aged 21-65 Years in a Large Integrated Health Care System - Southern California, January 1-September 30, 2019, and January 1-September 30, 2020. *MMWR Morb Mortal Wkly Rep*. 2021;70(4):109-13.
312. Mitchell L, Fuehrlein B. Patient Volume and Dispositions in a VA Psychiatric Emergency Room During COVID-19. *Community Ment Health J*. 2021;30:30.
313. Mitchell RD, O'Reilly GM, Mitra B, Smit V, Miller JP, Cameron PA. Impact of COVID-19 State of Emergency restrictions on presentations to two Victorian emergency departments. *Emerg Med Australas*. 2020;32(6):1027-33.
314. Molina Gutierrez MA, Ruiz Dominguez JA, Bueno Barriocanal M, de Miguel Lavisier B, Lopez Lopez R, Martin Sanchez J, et al. [Impact of the COVID-19 pandemic on emergency department: Early findings from a hospital in Madrid]. *An Pediatr (Engl Ed)*. 2020;93(5):313-22.
315. Montagnon R, Rouffilange L, Agard G, Benner P, Cazes N, Renard A. Impact of the COVID-19 Pandemic on Emergency Department Use: Focus on Patients Requiring Urgent Revascularization. *J Emerg Med*. 2021;60(2):229-36.

316. Montalbani B, Bargagna P, Mastrangelo M, Sarubbi S, Imbastro B, De Luca GP, et al. The COVID-19 Outbreak and Subjects With Mental Disorders Who Presented to an Italian Psychiatric Emergency Department. *J Nerv Ment Dis.* 2021;209(4):246-50.
317. Montesi G, Di Biase S, Chierchini S, Pavanato G, Viridis GE, Contato E, et al. Radiotherapy during COVID-19 pandemic. How to create a No fly zone: a Northern Italy experience. *Radiol Med.* 2020;125(6):600-3.
318. Morales X, Turrado V, de Lacy B, Hessheimer A, Fondevila C, de Lacy AM. Experience of an emergency surgery department during the pandemic caused by SARS-CoV-2 infection. *Emergencias.* 2020;32(6):435-6.
319. Moraveji S, Thaker AM, Muthusamy VR, Banerjee S. Protocols, Personal Protective Equipment Use, and Psychological/Financial Stressors in Endoscopy Units During the COVID-19 Pandemic: A Large Survey of Hospital-Based and Ambulatory Endoscopy Centers in the United States. *Gastroenterology.* 2020;159(4):1568-70 e5.
320. Morrison DR, Gentile C, McCammon S, Buczek E. Head and neck oncologic surgery in the COVID-19 pandemic: Our experience in a deep south tertiary care center. *Head Neck.* 2020;42(7):1471-6.
321. Mouchtouris N, Lavergne P, Montenegro TS, Gonzalez G, Baldassari M, Sharan A, et al. Telemedicine in Neurosurgery: Lessons Learned and Transformation of Care During the COVID-19 Pandemic. *World Neurosurg.* 2020;140:e387-e94.
322. Moussa O, Zakeri R, Arhi C, O'Kane M, Snowdon-Carr V, Menon V, et al. Impact of COVID-19 on Obesity Management Services in the United Kingdom (The COMS-UK study). *Obes Surg.* 2021;31(2):904-8.
323. Muldoon KA, Denize KM, Talarico R, Fell DB, Sobiesiak A, Heimerl M, et al. COVID-19 pandemic and violence: rising risks and decreasing urgent care-seeking for sexual assault and domestic violence survivors. *BMC Med.* 2021;19(1):20.
324. Mulholland RH, Wood R, Stagg HR, Fischbacher C, Villacampa J, Simpson CR, et al. Impact of COVID-19 on accident and emergency attendances and emergency and planned hospital admissions in Scotland: an interrupted time-series analysis. *J R Soc Med.* 2020;113(11):444-53.
325. Mustafa FA. No reduction in psychiatric emergency department visits during COVID-19: A downside of telepsychiatry? *Int J Soc Psychiatry.* 2020:20764020962533.
326. Nabian MH, Vosoughi F, Najafi F, Khabiri SS, Nafisi M, Veisi J, et al. Epidemiological pattern of pediatric trauma in COVID-19 outbreak: Data from a tertiary trauma center in Iran. *Injury.* 2020;51(12):2811-5.
327. Naidich JJ, Boltynkov A, Wang JJ, Chusid J, Hughes D, Sanelli PC. Impact of the Coronavirus Disease 2019 (COVID-19) Pandemic on Imaging Case Volumes. *J Am Coll Radiol.* 2020;17(7):865-72.
328. Nasta AM, Goel R, Kanagavel M, Easwaramoorthy S. Impact of COVID-19 on General Surgical Practice in India. *Indian J Surg.* 2020:1-5.
329. Negrini S, Donzelli S, Negrini A, Negrini A, Romano M, Zaina F. Feasibility and Acceptability of Telemedicine to Substitute Outpatient Rehabilitation Services in the COVID-19 Emergency in Italy: An Observational Everyday Clinical-Life Study. *Arch Phys Med Rehabil.* 2020;101(11):2027-32.
330. Negrini S, Grabljevec K, Boldrini P, Kiekens C, Moslavac S, Zampolini M, et al. Up to 2.2 million people experiencing disability suffer collateral damage each day of COVID-19 lockdown in Europe. *Eur J Phys Rehabil Med.* 2020;56(3):361-5.
331. Ness E, Salvador EM, Gardsjord ES. Patient visits to a psychiatric casualty clinic during the initial phase of the COVID-19 pandemic. *Tidsskr Nor Laegeforen.* 2020;140(11):18.
332. Ng JJ, Gan TRX, Niam JY, Menon RK, Ho P, Dharmaraj RB, et al. Experience from a Singapore tertiary hospital with restructuring of a vascular surgery practice in response to national and institutional policies during the COVID-19 pandemic. *J Vasc Surg.* 2020;72(4):1166-72.
333. Ng JJ, Ho P, Dharmaraj RB, Wong JCL, Choong A. The global impact of COVID-19 on vascular surgical services. *J Vasc Surg.* 2020;71(6):2182-3 e1.

334. Norbash AM, Moore AV, Jr., Recht MP, Brink JA, Hess CP, Won JJ, et al. Early-Stage Radiology Volume Effects and Considerations with the Coronavirus Disease 2019 (COVID-19) Pandemic: Adaptations, Risks, and Lessons Learned. *J Am Coll Radiol*. 2020;17(9):1086-95.
335. Norman C, Ragad L, Nagarajakumar A, Irshad H, Uhercik M, Giono I, et al. Impact of COVID-19 on Breast clinic follow ups – a new way forward? *Eur J Cancer*. 2020;138:S110.
336. Novara G, Bartoletti R, Crestani A, De Nunzio C, Durante J, Gregori A, et al. Impact of the COVID-19 pandemic on urological practice in emergency departments in Italy. *BJU Int*. 2020;126(2):245-7.
337. Nune A, Iyengar KP, Ahmed A, Bilgrami S, Sapkota HR. Impact of COVID-19 on rheumatology practice in the UK-a pan-regional rheumatology survey. *Clin Rheumatol*. 2021;40(6):2499-504.
338. Nunez JH, Porcel JA, Pijoan J, Batalla L, Teixidor J, Guerra-Farfan E, et al. Rethinking Trauma Hospital Services in one of Spain's Largest University Hospitals during the COVID-19 pandemic. How can we organize and help? Our experience. *Injury*. 2020;51(12):2827-33.
339. Nunez JH, Sallent A, Lakhani K, Guerra-Farfan E, Vidal N, Ekhtiari S, et al. Impact of the COVID-19 Pandemic on an Emergency Traumatology Service: Experience at a Tertiary Trauma Centre in Spain. *Injury*. 2020;51(7):1414-8.
340. O'Connor C, O'Connell G, Nic Dhonncha E, Roche L, Quinlan C, Murphy LA, et al. Sense and sensibility: an Irish dermatology department in the era of COVID-19. *Clin Exp Dermatol*. 2021;46(2):375-7.
341. Ojetti V, Covino M, Brigida M, Petruzzello C, Saviano A, Migneco A, et al. Non-COVID Diseases during the Pandemic: Where Have All Other Emergencies Gone? *Medicina (Kaunas)*. 2020;56(10):01.
342. Omar UF, Pei Yein T, Rajaratnam V. Managing hand and reconstructive microsurgery service during COVID-19 pandemic: Singapore experience. *Postgrad Med J*. 2020;96(1137):379-83.
343. Ong LK, Sivaneswaran L, Mohd Najib A, Devindran M, Say BL, Rohan MJ. Triage of urology referrals and outpatient service during COVID-19 pandemic: experience from a single centre in Malaysia. *Med J Malaysia*. 2020;75(4):400-2.
344. Oomman S, Todd E. Impact of COVID-19 lockdown on A&E performances in an NHS Foundation Trust. *Postgrad Med J*. 2021;97(1143):48-50.
345. orca@eoeortho.com OCEa, Collaborative O. The response of Trauma & Orthopaedic Departments to the first four weeks of lockdown for the COVID-19 pandemic - A trainee-led analysis of the East of England. *Surgeon*. 2021;19(1):e14-e9.
346. Ougrin D. Debate: Emergency mental health presentations of young people during the COVID-19 lockdown. *Child Adolesc Ment Health*. 2020;25(3):171-2.
347. Pagotto VPF, Abbas L, Goldenberg DC, Lobato RC, do Nascimento BB, Monteiro GGR, et al. The impact of COVID-19 on the plastic surgery activity in a high-complexity university hospital in Brazil: the importance of reconstructive plastic surgery during the pandemic. *Eur J Plast Surg*. 2020:1-6.
348. Papagiannopoulos P, Ganti A, Kim YJ, Raad RA, Kuan EC, Losavio P, et al. Impact of COVID-19 Pandemic on Ambulatory and Operating Room Rhinology Practice in the US. *Am J Rhinol Allergy*. 2020:1945892420961962.
349. Parikh KD, Ramaiya NH, Kikano EG, Tirumani SH, Pandya H, Stovicek B, et al. COVID-19 Pandemic Impact on Decreased Imaging Utilization: A Single Institutional Experience. *Acad Radiol*. 2020;27(9):1204-13.
350. Parikh KD, Ramaiya NH, Kikano EG, Tirumani SH, Pierce J, Butcher C, et al. Quantifying the decrease in emergency department imaging utilization during the COVID-19 pandemic at a multicenter healthcare system in Ohio. *Emerg Radiol*. 2020;27(6):765-72.
351. Park C, Sugand K, Nathwani D, Bhattacharya R, Sarraf KM. Impact of the COVID-19 pandemic on orthopedic trauma workload in a London level 1 trauma center: the "golden month". *Acta Orthop*. 2020;91(5):556-61.
352. Pata D, Gatto A, Buonsenso D, Chiaretti A. A COVID-19 outbreak's lesson: Best use of the paediatric emergency department. *Acta Paediatr*. 2020;109(9):1903-4.



353. Patel PD, Kelly KA, Reynolds RA, Turer RW, Salwi S, Rosenbloom ST, et al. Tracking the Volume of Neurosurgical Care During the Coronavirus Disease 2019 Pandemic. *World Neurosurg.* 2020;142:e183-e94.
354. Patel S, Issaka RB, Chen E, Somsouk M. Colorectal Cancer Screening and COVID-19. *Am J Gastroenterol.* 2021;116(2):433-4.
355. Patel SY, Mehrotra A, Huskamp HA, Uscher-Pines L, Ganguli I, Barnett ML. Variation In Telemedicine Use And Outpatient Care During The COVID-19 Pandemic In The United States. *Health Aff (Millwood).* 2021;40(2):349-58.
356. Patt D, Gordan L, Diaz M, Okon T, Grady L, Harmison M, et al. Impact of COVID-19 on Cancer Care: How the Pandemic Is Delaying Cancer Diagnosis and Treatment for American Seniors. *JCO Clin Cancer Inform.* 2020;4:1059-71.
357. Pavia G, Gargiulo L, Valenti M, Facheris P, Nucca O, Narcisi A, et al. Skin cancers: how to balance the risks and benefits of surgery during COVID-19 pandemic (a Northern Italy single-center experience). *Int J Dermatol.* 2020;59(10):1287-9.
358. Peeters JJM, van den Berg P, van den Bergh JP, Emmelot-Vonk MH, de Klerk G, Lems WF, et al. Osteoporosis care during the COVID-19 pandemic in the Netherlands: A national survey. *Arch Osteoporos.* 2021;16(1):11.
359. Peiro-Garcia A, Corominas L, Coelho A, DeSena-DeCabo L, Torner-Rubies F, Fontecha CG. How the COVID-19 pandemic is affecting paediatric orthopaedics practice: a preliminary report. *J Child Orthop.* 2020;14(3):154-60.
360. Pellegrini M, Roda M, Lupardi E, Di Geronimo N, Giannaccare G, Schiavi C. The impact of COVID-19 pandemic on ophthalmological emergency department visits. *Acta Ophthalmol.* 2020;98(8):e1058-e9.
361. Penalva G, Benavente RS, Perez-Moreno MA, Perez-Pacheco MD, Perez-Milena A, Murcia J, et al. Effect of the coronavirus disease 2019 pandemic on antibiotic use in primary care. *Clin Microbiol Infect.* 2021;01:01.
362. Phadke NA, Del Carmen MG, Goldstein SA, Vagle J, Hidrue MK, Botti ES, et al. Trends in Ambulatory Electronic Consultations During the COVID-19 Pandemic. *J Gen Intern Med.* 2020;35(10):3117-9.
363. Pham-Scottez A, Silva J, Barruel D, Masson VD, Yon L, Trebalag AK, et al. Patient flow in the largest French psychiatric emergency centre in the context of the COVID-19 pandemic. *Psychiatry Res.* 2020;291:113205.
364. Picchio CA, Valencia J, Doran J, Swan T, Pastor M, Martro E, et al. The impact of the COVID-19 pandemic on harm reduction services in Spain. *Harm Reduct J.* 2020;17(1):87.
365. Pichard R, Kopel L, Lejeune Q, Masmoudi R, Masmehjean EH. Impact of the CORonaVirus Disease 2019 lockdown on hand and upper limb emergencies: experience of a referred university trauma hand centre in Paris, France. *Int Orthop.* 2020;44(8):1497-501.
366. Pignatti M, Pinto V, Miralles MEL, Giorgini FA, Cannamela G, Cipriani R. How the COVID-19 pandemic changed the Plastic Surgery activity in a regional referral center in Northern Italy. *J Plast Reconstr Aesthet Surg.* 2020;73(7):1348-56.
367. Pignon B, Gourevitch R, Tebeka S, Dubertret C, Cardot H, Dauriac-Le Masson V, et al. Dramatic reduction of psychiatric emergency consultations during lockdown linked to COVID-19 in Paris and suburbs. *Psychiatry Clin Neurosci.* 2020;74(10):557-9.
368. Pinar U, Anract J, Duquesne I, Dariane C, Chartier-Kastler E, Cussenot O, et al. [Impact of the COVID-19 pandemic on surgical activity within academic urological departments in Paris]. *Prog Urol.* 2020;30(8-9):439-47.
369. Pines JM, Zocchi MS, Black BS, Carlson JN, Celedon P, Moghtaderi A, et al. Characterizing pediatric emergency department visits during the COVID-19 pandemic. *Am J Emerg Med.* 2021;41:201-4.
370. Pintado JF, Gibaja W, Vallejos RA, Rosas W, Guerra-Farfan E, Nunez JH. How COVID-19 has affected emergent visits to a Latin-American trauma department: Experience at a Peruvian national trauma referral center. *Injury.* 2020;51(12):2834-9.
371. Polan C, Burggraf M, Kauther MD, Meyer HL, Rademacher F, Braitsch H, et al. Development of Case Numbers during the COVID-19 Pandemic in a Center of Maximum-Care for Traumatology and Orthopedic Oncology. *Healthcare (Basel).* 2020;9(1):22.

372. Porreca A, Colicchia M, D'Agostino D, Amenta M, Corsaro A, Zaramella S, et al. Urology in the Time of Coronavirus: Reduced Access to Urgent and Emergent Urological Care during the Coronavirus Disease 2019 Outbreak in Italy. *Urol Int.* 2020;104(7-8):631-6.
373. Posarelli C, Maglionico MN, Covello G, Louidice P, Cipriano A, Santini M, et al. Ophthalmological emergencies and the SARS-CoV-2 outbreak. *PLoS ONE.* 2020;15(10):e0239796.
374. Prasad N, Bhatt M, Agarwal SK, Kohli HS, Gopalakrishnan N, Fernando E, et al. The Adverse Effect of COVID Pandemic on the Care of Patients With Kidney Diseases in India. *Kidney Int Rep.* 2020;5(9):1545-50.
375. Prayer-Galetti T, Motterle G, Morlacco A, Celso F, Boemo D, Iafrate M, et al. Urological Care and COVID-19: Looking Forward. *Front Oncol.* 2020;10:1313.
376. Puiguirguer-Ferrando J, Salgado-Garcia E, Nogue-Xarau S. Emergency-department-treated poisonings during home confinement for the COVID-19 pandemic. *Emergencias.* 2020;32(4):300-1.
377. Qasim Z, Sjöholm LO, Volgraf J, Sailes S, Nance ML, Perks DH, et al. Trauma center activity and surge response during the early phase of the COVID-19 pandemic-the Philadelphia story. *J Trauma Acute Care Surg.* 2020;89(4):821-8.
378. Quadri G, Rognoni A, Cerrato E, Baralis G, Boccuzzi G, Brscic E, et al. Catheterization laboratory activity before and during COVID-19 spread: A comparative analysis in Piedmont, Italy, by the Italian Society of Interventional Cardiology (GISE). *Int J Cardiol.* 2021;323:288-91.
379. Qua Quarini E, Saltalamacchia G, Presti D, Caldana G, Tibollo V, Malovini A, et al. Impact of COVID-19 Outbreak on Cancer Patient Care and Treatment: Data from an Outpatient Oncology Clinic in Lombardy (Italy). *Cancers (Basel).* 2020;12(10):12.
380. Quiros-Roldan E, Magro P, Carriero C, Chiesa A, El Hamad I, Tratta E, et al. Consequences of the COVID-19 pandemic on the continuum of care in a cohort of people living with HIV followed in a single center of Northern Italy. *AIDS Res Ther.* 2020;17(1):59.
381. Raj Kumar B, Pandey D, Rohila J, deSouza A, Saklani A. An observational study of the demographic and treatment changes in a tertiary colorectal cancer center during the COVID-19 pandemic. *J Surg Oncol.* 2020;122(7):1271-5.
382. Rathore C, Baheti N, Bansal AR, Jabeen SA, Gopinath S, Jagtap S, et al. Impact of COVID-19 pandemic on epilepsy practice in India: A tripartite survey. *Seizure.* 2021;86:60-7.
383. Rathore LP, Kalia S, Gupta L, Negi V, Vatsyan K, Katoch P, et al. Change in Trauma Patterns in Hilly Areas of Northern India during Nationwide Lockdown: A Cross-sectional Study. *Journal of Clinical and Diagnostic Research.* 2020;14(10):RC01-RC3.
384. Raucci U, Musolino AM, Di Lallo D, Piga S, Barbieri MA, Pisani M, et al. Impact of the COVID-19 pandemic on the Emergency Department of a tertiary children's hospital. *Ital J Pediatr.* 2021;47(1):21.
385. Rausa E, Kelly ME, Manfredi R, Riva I, Lucianetti A. Impact of COVID-19 on attendances to a major emergency department: an Italian perspective. *Intern Med J.* 2020;50(9):1159-60.
386. Rawal M, Kathayet TS, Rokaya PK, Thakur AK, Mahat S, Acharya BD, et al. Orthopaedics Practice in a Rural Hospital During the COVID-19 Pandemic: A Descriptive Cross-Sectional Study. *Journal of Nepal Medical Association.* 2020;58(231):847-50.
387. Reddy A, Gunnink E, Deeds SA, Hagan SL, Heyworth L, Mattras TF, et al. A rapid mobilization of 'virtual' primary care services in response to COVID-19 at Veterans Health Administration. *Healthc (Amst).* 2020;8(4):100464.
388. Regas I, Bellemere P, Lamon B, Bouju Y, Lecoq FA, Chaves C. Hand injuries treated at a hand emergency center during the COVID-19 lockdown. *Hand Surg Rehabil.* 2020;39(5):459-61.
389. Revet A, Hebebrand J, Anagnostopoulos D, Kehoe LA, Child C-, Adolescent Psychiatry C, et al. ESCAP CovCAP survey of heads of academic departments to assess the perceived initial (April/May 2020) impact of the COVID-19 pandemic on child and adolescent psychiatry services. *Eur Child Adolesc Psychiatry.* 2021;20:20.



390. Rhatomy S, Phatama KY, Rasyid FA, Mustamsir E. Changes in Orthopedic Services in Two Indonesian Tertiary-referral Hospitals during the Coronavirus-19 Pandemic. *Open Access Macedonian Journal of Medical Sciences*. 2020;8(T1):538-41.
391. Roberts SCM, Schroeder R, Joffe C. COVID-19 and Independent Abortion Providers: Findings from a Rapid-Response Survey. *Perspect Sex Reprod Health*. 2020;52(4):217-25.
392. Rodriguez-Jimenez R, Rentero D, Romero-Ferreiro V, Garcia-Fernandez L. Impact of outbreak COVID-19 pandemic on psychiatry emergencies in Spain. *Psychiatry Res*. 2021;295:113581.
393. Rodríguez-Leor O, Cid-Álvarez B, Ojeda S, Martín-Moreiras J, Rumoroso JR, López-Palop R, et al. Impact of the COVID-19 pandemic on interventional cardiology activity in Spain. *REC: Interventional Cardiology*. 2020;2(2):82-9.
394. Rogers MC, Wallace MM, Wheless L, Dewan AK. Impact of the COVID-19 pandemic on inpatient dermatology consult patterns at a tertiary care hospital: A retrospective cohort study. *J Am Acad Dermatol*. 2021;84(1):156-8.
395. Rohan P, Slattery F, Nason GJ, Chelyn R, Schmidt K, Mealy K. The Impact of Covid-19 on Surgical Activity in A Model 3 Irish Hospital. *Ir J Med Sci*. 2020;189(Suppl 5):S113-S.
396. Roncero C, Garcia-Ullan L, de la Iglesia-Larrad JI, Martin C, Andres P, Ojeda A, et al. The response of the mental health network of the Salamanca area to the COVID-19 pandemic: The role of the telemedicine. *Psychiatry Res*. 2020;291:113252.
397. Rosales JS, Rodriguez-Perez MS, Ameriso SF. [Effect of the COVID-19 pandemic and preventive social isolation measures on the number of outpatient visits, hospitalizations and treatment of cerebrovascular accident in a neurological center in Argentina]. *Medicina (B Aires)*. 2020;80 Suppl 6:65-70.
398. Roscigno M, Naspro R, Picciche A, Muttin F, Angiolilli D, Deiana G, et al. A Snapshot from the Department of Urology in Bergamo Evaluating the Timeline of the SARS-CoV-2 Outbreak: Which Patients Are We Missing? *Eur Urol Focus*. 2020;6(5):1120-3.
399. Rosen CS, Morland LA, Glassman LH, Marx BP, Weaver K, Smith CA, et al. Virtual mental health care in the Veterans Health Administration's immediate response to coronavirus disease-19. *Am Psychol*. 2021;76(1):26-38.
400. Rossi A, Prochowski lamurri A, Cerchione C, Gentili N, Danesi V, Altini M, et al. Radiology imaging management in an Italian cancer center (IRST IRCCS) during the COVID-19 pandemic. *Insights Imaging*. 2020;11(1):129.
401. Ruggieri P, Trovarelli G, Angelini A, Pala E, Berizzi A, Donato D. COVID-19 strategy in organizing and planning orthopedic surgery in a major orthopedic referral center in an area of Italy severely affected by the pandemic: experience of the Department of Orthopedics, University of Padova. *J Orthop Surg Res*. 2020;15(1):279.
402. Rupa R, Sass B, Morales Lema MA, Nimsy C, Voellger B. The Demand for Elective Neurosurgery at a German University Hospital during the First Wave of COVID-19. *Healthcare (Basel)*. 2020;8(4).
403. Saab R, Obeid A, Gachi F, Boudiaf H, Sargsyan L, Al-Saad K, et al. Impact of the coronavirus disease 2019 (COVID-19) pandemic on pediatric oncology care in the Middle East, North Africa, and West Asia region: A report from the Pediatric Oncology East and Mediterranean (POEM) group. *Cancer*. 2020;126(18):4235-45.
404. Sacchelli L, Viviani F, Orioni G, Rucci P, Rosa S, Lanzoni A, et al. Sexually transmitted infections during the COVID-19 outbreak: comparison of patients referring to the service of sexually transmitted diseases during the sanitary emergency with those referring during the common practice. *J Eur Acad Dermatol Venereol*. 2020;34(10):e553-e6.
405. Sacco E, Gandi C, Li Marzi V, Lamberti G, Serati M, Agro EF, et al. Extensive impact of COVID-19 pandemic on pelvic floor dysfunctions care: A nationwide interdisciplinary survey. *Neurourol Urodyn*. 2021;40(2):695-704.
406. Sadler D, DeCara JM, Herrmann J, Arnold A, Ghosh AK, Abdel-Qadir H, et al. Perspectives on the COVID-19 pandemic impact on cardio-oncology: results from the COVID-19 International Collaborative Network survey. *Cardiooncology*. 2020;6(1):28.
407. Salsi G, Seidenari A, Diglio J, Bellussi F, Pilu G, Bellussi F. Obstetrics and gynecology emergency services during the coronavirus disease 2019 pandemic. *Am J Obstet Gynecol MFM*. 2020;2(4):100214.

408. Samaila EM, Negri S, Corzani M, Zancan F, Maluta T, Magnan B. The burden of proximal femur fractures and other skeletal injuries during the Covid-19 pandemic lockdown: a retrospective comparative study. *Acta Biomed.* 2020;91(14-S):e2020001.
409. Santana R, Sousa Joana S, Soares P, Lopes S, Boto P, Rocha João V. The Demand for Hospital Emergency Services: Trends during the First Month of COVID-19 Response. *Portuguese Journal of Public Health.* 2020;38(1):30-6.
410. Santos C, Fernandes AFC, Silva DMD, Castro R. Restructuring service at a mastology outpatient clinic during the COVID-19 pandemic. *Rev Bras Enferm.* 2021;74Suppl 1(Suppl 1):e20200571.
411. Sato Y, Fujiwara Y, Fukuda N, Hayama B, Ito Y, Ohno S, et al. Changes in Treatment Behavior during the COVID-19 Pandemic among Patients at a Cancer Hospital. *Cancer Cell.* 2021;39(2):130-1.
412. Scaramuzza A, Tagliaferri F, Bonetti L, Soliani M, Morotti F, Bellone S, et al. Changing admission patterns in paediatric emergency departments during the COVID-19 pandemic. *Arch Dis Child.* 2020;105(7):704-6.
413. Schaffert M, Zimmermann F, Bauer L, Kastner S, Schwarz A, Strenger V, et al. Austrian study shows that delays in accessing acute paediatric health care outweighed the risks of COVID-19. *Acta Paediatr.* 2020;109(11):2309-10.
414. Schwarz V, Mahfoud F, Lauder L, Reith W, Behnke S, Smola S, et al. Decline of emergency admissions for cardiovascular and cerebrovascular events after the outbreak of COVID-19. *Clin Res Cardiol.* 2020;109(12):1500-6.
415. Sciarra A, Salciccia S, Maggi M, Del Giudice F, Busetto GM, Musio D, et al. Elective procedures for prostate cancer in the time of Covid-19: a multidisciplinary team experience. *Prostate Cancer Prostatic Dis.* 2020:1-3.
416. Scott CEH, Holland G, Powell-Bowns MFR, Brennan CM, Gillespie M, Mackenzie SP, et al. Population mobility and adult orthopaedic trauma services during the COVID-19 pandemic: fragility fracture provision remains a priority. *Bone Jt Open.* 2020;1(6):182-9.
417. Sekine I, Uojima H, Koyama H, Kamio T, Sato M, Yamamoto T, et al. Impact of non-pharmaceutical interventions for the COVID-19 pandemic on emergency department patient trends in Japan: a retrospective analysis. *Acute Med Surg.* 2020;7(1):e603.
418. Sethuraman U, Stankovic C, Singer A, Vitale L, Krouse CB, Cloutier D, et al. Burn visits to a pediatric burn center during the COVID-19 pandemic and 'Stay at home' period. *Burns.* 2021;47(2):491-2.
419. Setzen M, Svider PF, Setzen S, Setzen G, Eloy JA, Johnson AP. The novel corona virus and rhinology: Impact on practice patterns and future directions. *Am J Otolaryngol.* 2020;41(6):102569.
420. Shanshal M, Ahmed HS, Asfoor H, Salih RI, Ali SA, Aldabouni YK. Impact of COVID-19 on medical practice: A nationwide survey of dermatologists and health care providers in Iraq. *Clin Dermatol.* 2020.
421. Sharma AK, Gandhoke CS, Nayak N. Effect of coronavirus disease 2019 pandemic on case volume, spectrum, and perioperative coronavirus disease 2019 incidence in neurosurgical patients: An experience at a tertiary care center in India. *Surg Neurol Int.* 2020;11:390.
422. Sharma E, Meade S, D'Errico F, Pavlidis P, Lubner R, Zeki S, et al. The effects of COVID-19 on IBD prescribing and service provision in a UK tertiary centre. *GastroHep.* 2020;2(6):318-26.
423. Sherman WF, Khadra HS, Kale NN, Wu VJ, Gladden PB, Lee OC. How Did the Number and Type of Injuries in Patients Presenting to a Regional Level I Trauma Center Change During the COVID-19 Pandemic with a Stay-at-home Order? *Clin Orthop Relat Res.* 2021;479(2):266-75.
424. Shi G, Huang J, Pi M, Chen X, Li X, Ding Y, et al. Impact of early Coronavirus Disease 2019 pandemic on pediatric cardiac surgery in China. *J Thorac Cardiovasc Surg.* 2021;161(5):1605-14 e4.
425. Shi J, Giess CS, Martin T, Lemaire KA, Curley PJ, Bay C, et al. Radiology Workload Changes During the COVID-19 Pandemic: Implications for Staff Redeployment. *Acad Radiol.* 2021;28(1):1-7.
426. Shin JH, Takada D, Morishita T, Lin H, Bun S, Teraoka E, et al. Economic impact of the first wave of the COVID-19 pandemic on acute care hospitals in Japan. *PLoS ONE.* 2020;15(12):e0244852.

427. Siedner MJ, Kraemer JD, Meyer MJ, Harling G, Mngomezulu T, Gabela P, et al. Access to primary healthcare during lockdown measures for COVID-19 in rural South Africa: an interrupted time series analysis. *BMJ Open*. 2020;10(10):e043763.
428. Sigurdsson EL, Blondal AB, Jonsson JS, Tomasdottir MO, Hrafnkelsson H, Linnét K, et al. How primary healthcare in Iceland swiftly changed its strategy in response to the COVID-19 pandemic. *BMJ Open*. 2020;10(12):e043151.
429. Singh R, Sahu A, Singh K, Prasad RS, Pandey N, Singh RC. Impact of COVID-19 Pandemic on Neurosurgical Practice in a Tertiary Care Center in India. *J Neurosci Rural Pract*. 2021;12(1):24-32.
430. Slagman A, Behringer W, Greiner F, Klein M, Weismann D, Erdmann B, et al. Medical Emergencies During the COVID-19 Pandemic. *Dtsch Arztebl Int*. 2020;117(33-34):545-52.
431. Smalley CM, Malone DA, Jr., Meldon SW, Borden BL, Simon EL, Muir MR, et al. The impact of COVID-19 on suicidal ideation and alcohol presentations to emergency departments in a large healthcare system. *Am J Emerg Med*. 2021;41:237-8.
432. Smarrazzo A, Mariani R, Valentini F, Lombardi MH, Sinibaldi S, Peschiaroli E, et al. Three-fold increase in admissions for paediatric febrile convulsions during COVID-19 pandemic could indicate alternative virus symptoms. *Acta Paediatr*. 2021;110(3):939-40.
433. Soler MJ, Heras MM, Ortiz A, del Pino y Pino MD, Lazo MS. Impact of COVID-19 pandemic in Spanish Nephrology Services. *Nefrología (English Edition)*. 2020;40(6):579-84.
434. Soytaş M, Boz MY, Guzelburc V, Calik G, Horuz R, Akbulut Z, et al. Comparison of before and after COVID-19 urology practices of a pandemic hospital. *Turk J Urol*. 2020;46(6):474-80.
435. Spalletta G, Porcari DE, Banaj N, Ciullo V, Palmer K. Effects of COVID-19 Infection Control Measures on Appointment Cancellation in an Italian Outpatient Memory Clinic. *Front Psychiatry*. 2020;11:599844.
436. Spencer K, Jones CM, Girdler R, Roe C, Sharpe M, Lawton S, et al. The impact of the COVID-19 pandemic on radiotherapy services in England, UK: a population-based study. *Lancet Oncol*. 2021;22(3):309-20.
437. Sperring H, Ruiz-Mercado G, Schechter-Perkins EM. Impact of the 2020 COVID-19 Pandemic on Ambulatory Hepatitis C Testing. *J Prim Care Community Health*. 2020;11:2150132720969554.
438. Stein HC, Giordano B, Del Giudice R, Basi C, Gambini O, D'Agostino A. Pre/post comparison study of emergency mental health visits during the COVID-19 lockdown in Lombardy, Italy. *Psychiatry Clin Neurosci*. 2020;74(11):605-7.
439. Stella F, Alexopoulos C, Scquizzato T, Zorzi A. Impact of the COVID-19 outbreak on emergency medical system missions and emergency department visits in the Venice area. *Eur J Emerg Med*. 2020;27(4):298-300.
440. Stoss C, Steffani M, Kohlhaw K, Rudroff C, Staib L, Hartmann D, et al. The COVID-19 pandemic: impact on surgical departments of non-university hospitals. *BMC surg*. 2020;20(1):313.
441. Stover T, Dazert S, Hoffmann TK, Plontke SK, Ambrosch P, Arens C, et al. [Effects of the SARS-CoV-2 pandemic on the otorhinolaryngology university hospitals in the field of medical care]. *Laryngorhinootologie*. 2020;99(10):694-706.
442. Stramare R, Carretta G, Capizzi A, Boemo DG, Contessa C, Motta R, et al. Radiological management of COVID-19: structure your diagnostic path to guarantee a safe path. *Radiol Med*. 2020;125(7):691-4.
443. Subbiah S, Hussain SA, Samanth Kumar M. Managing cancer during COVID pandemic - Experience of a tertiary cancer care center. *Eur J Surg Oncol*. 2021;47(5):1220-4.
444. Sugand K, Park C, Morgan C, Dyke R, Aframian A, Hulme A, et al. Impact of the COVID-19 pandemic on paediatric orthopaedic trauma workload in central London: a multi-centre longitudinal observational study over the "golden weeks". *Acta Orthop*. 2020;91(6):633-8.
445. Sun H, Liu K, Li M, Tang S, Monte AA, Wang J, et al. The influence of coronavirus disease 2019 on emergency department visits in Nanjing, China: A multicentre cross-sectional study. *Am J Emerg Med*. 2020;38(10):2101-9.

446. Suryaningtyas W, Wahyuhadi J, Turchan A, Subagio EA, Parenrengi MA, Apriawan T, et al. Neurosurgery at the epicenter of the COVID-19 pandemic in Indonesia: experience from a Surabaya academic tertiary hospital. *Neurosurg Focus*. 2020;49(6):E5.
447. Sutherland K, Chessman J, Zhao J, Sara G, Shetty A, Smith S, et al. Impact of COVID-19 on healthcare activity in NSW, Australia. *Public Health Res Pract*. 2020;30(4):09.
448. Swedo E, Idaikkadar N, Leemis R, Dias T, Radhakrishnan L, Stein Z, et al. Trends in U.S. Emergency Department Visits Related to Suspected or Confirmed Child Abuse and Neglect Among Children and Adolescents Aged <18 Years Before and During the COVID-19 Pandemic - United States, January 2019-September 2020. *MMWR Morb Mortal Wkly Rep*. 2020;69(49):1841-7.
449. Szeles R, Szentmary N, Burka G, Nagy ZZ, Gombos K, Hargitai J. Impact of the COVID19 pandemic on ophthalmic outpatient care at the Ophthalmology Department of the New St. John's Hospital, Budapest. *Orv Hetil*. 2021;162(6):203-11.
450. Tam CF, Cheung KS, Lam S, Wong A, Yung A, Sze M, et al. Impact of coronavirus disease 2019 (COVID-19) outbreak on outcome of myocardial infarction in Hong Kong, China. *Catheter Cardiovasc Interv*. 2021;97(2):E194-E7.
451. Tam S, Wu VF, Williams AM, Girgis M, Sheqwarra JZ, Siddiqui F, et al. Disparities in the Uptake of Telemedicine During the COVID-19 Surge in a Multidisciplinary Head and Neck Cancer Population by Patient Demographic Characteristics and Socioeconomic Status. *JAMA Otolaryngol Head Neck Surg*. 2021;147(2):209-11.
452. Tan JKH, Pang NQ, Bonney GK, Kow AWC, Vathsala A, Iyer SG. Optimization of Outpatient Transplantation Services During the COVID-19 Pandemic: A South-East Asian Tertiary Organ Transplant Centre Experience. *Br J Surg*. 2020;107(11):e506-e7.
453. Tan YN, Vandekerckhove PJ, Verdonk P. The long road to recovery: at six months since the first COVID-19 wave, elective orthopedic care has still not fully recovered in Belgium. *J Exp Orthop*. 2020;7(1):99.
454. Tanner K, Bican R, Boster J, Christensen C, Coffman C, Fallieras K, et al. Feasibility and Acceptability of Clinical Pediatric Telerehabilitation Services. *Int J Telerehabil*. 2020;12(2):43-52.
455. Tao J, Napoleon SC, Maynard MA, Almonte A, Silva E, Toma E, et al. Impact of the COVID-19 Pandemic on Sexually Transmitted Infection Clinic Visits. *Sex Transm Dis*. 2021;48(1):e5-e7.
456. Taquechel K, Diwadkar AR, Sayed S, Dudley JW, Grundmeier RW, Kenyon CC, et al. Pediatric Asthma Health Care Utilization, Viral Testing, and Air Pollution Changes During the COVID-19 Pandemic. *J Allergy Clin Immunol Pract*. 2020;8(10):3378-87 e11.
457. Tartari F, Guglielmo A, Fuligni F, Pileri A. Changes in emergency service access after spread of COVID-19 across Italy. *J Eur Acad Dermatol Venereol*. 2020;34(8):e350-e1.
458. Taxonera C, Alba C, Olivares D, Martin M, Ventero A, Canas M. Innovation in IBD Care During the COVID-19 Pandemic: Results of a Cross-Sectional Survey on Patient-Reported Experience Measures. *Inflamm Bowel Dis*. 2021;27(6):864-9.
459. Taylor B, Egolum U, Patel N, Ling H. Changes in the pattern of heart failure and diuresis clinic utilization during the COVID-19 pandemic. *Heart Lung*. 2020;49(6):729-30.
460. Telich-Tarriba JE, Navarro-Barquin DF. Plastic surgery emergency surgical care during the COVID-19 lockdown at a Mexico City academic center. *J Plast Reconstr Aesthet Surg*. 2021;74(3):644-710.
461. Teoh JY, Ong WLK, Gonzalez-Padilla D, Castellani D, Dubin JM, Esperto F, et al. A Global Survey on the Impact of COVID-19 on Urological Services. *Eur Urol*. 2020;78(2):265-75.
462. Tian TM, Ghura V. Changes in UK dermatological surgery during the COVID-19 pandemic. *Clin Exp Dermatol*. 2021;46(2):372-5.
463. Toro MD, Brezin AP, Burdon M, Cummings AB, Evren Kemer O, Malyugin BE, et al. Early impact of COVID-19 outbreak on eye care: Insights from EUROCOVCAT group. *Eur J Ophthalmol*. 2021;31(1):5-9.

464. Torzilli G, Vigano L, Galvanin J, Castoro C, Quagliuolo V, Spinelli A, et al. A Snapshot of Elective Oncological Surgery in Italy During COVID-19 Emergency: Pearls, Pitfalls, and Perspectives. *Ann Surg*. 2020;272(2):e112-e7.
465. Toyoda H, Huang DQ, Le MH, Nguyen MH. Liver Care and Surveillance: The Global Impact of the COVID-19 Pandemic. *Hepatol Commun*. 2020;03:03.
466. Trehan A, Jain R, Bansal D. Oncology care in a lower middle-income country during the COVID-19 pandemic. *Pediatr Blood Cancer*. 2020;67(8):e28438.
467. Tsioufis K, Chrysohoou C, Kariori M, Leontsinis I, Dalakouras I, Papanikolaou A, et al. The mystery of "missing" visits in an emergency cardiology department, in the era of COVID-19.; a time-series analysis in a tertiary Greek General Hospital. *Clin Res Cardiol*. 2020;109(12):1483-9.
468. Tuominen J, Hallberg V, Oksala N, Palomaki A, Lukkarinen T, Roine A. NYU-EDA in modelling the effect of COVID-19 on patient volumes in a Finnish emergency department. *BMC Emerg Med*. 2020;20(1):97.
469. Turan C, Metin N, Utlu Z, Oner U, Kotan OS. Change of the diagnostic distribution in applicants to dermatology after COVID-19 pandemic: What it whispers to us? *Dermatol Ther*. 2020;33(4):e13804.
470. Turkmen D, Altunisik N, Mantar I, Durmaz I, Sener S, Colak C. Comparison of patients' diagnoses in a dermatology outpatient clinic during the COVID-19 pandemic period and pre-pandemic period. *Int J Clin Pract*. 2021;75(4):e13948.
471. Tyagi R, Mittal S, Madan K, Mohan A, Hadda V, Tiwari P, et al. Assessment of the impact and reorganization of interventional pulmonology services at a tertiary care centre during nationwide lockdown for COVID-19 pandemic. *Monaldi Arch Chest Dis*. 2021;91(1):25.
472. Ueda K, Ota I, Yamanaka T, Kitahara T. The Impact of the COVID-19 Pandemic on Follow-Ups for Vertigo/Dizziness Outpatients. *Ear Nose Throat J*. 2021;100(2\_suppl):163S-8S.
473. Umapathi P, Cuomo K, Riley S, Hubbard A, Menzel K, Sauer E, et al. Transforming Ambulatory Heart Failure Care in the Coronavirus Disease-19 Era: Initial Experience From a Heart Failure Disease Management Clinic. *J Card Fail*. 2020;26(7):637-8.
474. Vagal A, Mahoney M, Allen B, Kapur S, Udstuen G, Wang L, et al. Rescheduling Nonurgent Care in Radiology: Implementation During the Coronavirus Disease 2019 (COVID-19) Pandemic. *J Am Coll Radiol*. 2020;17(7):882-9.
475. Vagal A, Mahoney M, Anderson JL, Allen B, Hudepohl J, Chadalavada S, et al. Recover Wisely From COVID-19: Responsible Resumption of Nonurgent Radiology Services. *Acad Radiol*. 2020;27(10):1343-52.
476. Valand P, Lloyd N, Robson M, Steele J. Trauma transformed: A positive review of change during the COVID-19 pandemic. *J Plast Reconstr Aesthet Surg*. 2020;73(7):1357-404.
477. Vanni G, Legramante JM, Pellicciaro M, G DEC, Cotesta M, Materazzo M, et al. Effect of Lockdown in Surgical Emergency Accesses: Experience of a COVID-19 Hospital. *In Vivo*. 2020;34(5):3033-8.
478. Vasquez L, Sampor C, Villanueva G, Maradiegue E, Garcia-Lombardi M, Gomez-Garcia W, et al. Early impact of the COVID-19 pandemic on paediatric cancer care in Latin America. *Lancet Oncol*. 2020;21(6):753-5.
479. Velasco Zuniga R. Analysis of the impact of COVID-19 pandemic confinement on demand for pediatric emergency care and the characteristics of children attended. *Emergencias*. 2021;33(1):78.
480. Venkataram T, Goyal N, Dash C, Chandra PP, Chaturvedi J, Raheja A, et al. Impact of the COVID-19 Pandemic on Neurosurgical Practice in India: Results of an Anonymized National Survey. *Neurol India*. 2020;68(3):595-602.
481. Vicini E, Galimberti V, Naninato P, Vento AR, Ribeiro Fontana SK, Veronesi P. COVID-19: The European institute of oncology as a "hub" centre for breast cancer surgery during the pandemic in Milan (Lombardy region, northern Italy) - A screenshot of the first month. *Eur J Surg Oncol*. 2020;46(6):1180-1.
482. Vierucci F, Bacci C, Mucaria C, Dini F, Federico G, Maielli M, et al. How COVID-19 Pandemic Changed Children and Adolescents Use of the Emergency Department: the Experience of a Secondary Care Pediatric Unit in Central Italy. *SN Compr Clin Med*. 2020:1-11.

483. Vingiani V, Abadia AF, Posa A, Corvino A, Pasqualetto L, Presidente A, et al. How the Workload and Outcome of Imaging Examinations Changed During the COVID-19 Pandemic Lockdown. *Acta Biomed.* 2020;91(4):e2020166.
484. Walker DM, Tolentino VR. COVID-19: the effects on the practice of pediatric emergency medicine. *Pediatr Emerg Med Pract.* 2020;17(Suppl 6-3):1-15.
485. Walker LE, Heaton HA, Monroe RJ, Reichard RR, Kendall M, Mullan AF, et al. Impact of the SARS-CoV-2 Pandemic on Emergency Department Presentations in an Integrated Health System. *Mayo Clin Proc.* 2020;95(11):2395-407.
486. Walline JH, Song PP, Lim AM, Hung KK, Graham CA. Hong Kong emergency department attendance plummets during COVID-19. *Emerg Med Australas.* 2020;32(6):1093-4.
487. Wang R, Helf C, Tizek L, Neuhauser R, Eyerich K, Zink A, et al. The Impact and Consequences of SARS-CoV-2 Pandemic on a Single University Dermatology Outpatient Clinic in Germany. *Int J Environ Res Public Health.* 2020;17(17):26.
488. Wang XS, Zeng M. Challenges for a Cancer Center in the Novel Coronavirus Pneumonia Epidemic. *Technol Cancer Res Treat.* 2020;19:1533033820945774.
489. Wasser LM, Weill Y, Brosh K, Magal I, Potter M, Strassman I, et al. The Impact of COVID-19 on Intravitreal Injection Compliance. *SN Compr Clin Med.* 2020:1-4.
490. Welman T, Hobday D, El-Ali K, Pahal GS. The COVID-19 Pandemic: The effect on hand trauma in Europe's busiest major trauma centre. *J Plast Reconstr Aesthet Surg.* 2021;74(3):644-710.
491. Westgard BC, Morgan MW, Vazquez-Benitez G, Erickson LO, Zwank MD. An Analysis of Changes in Emergency Department Visits After a State Declaration During the Time of COVID-19. *Ann Emerg Med.* 2020;76(5):595-601.
492. Whaley CM, Pera MF, Cantor J, Chang J, Velasco J, Hagg HK, et al. Changes in Health Services Use Among Commercially Insured US Populations During the COVID-19 Pandemic. *JAMA Netw Open.* 2020;3(11):e2024984.
493. Williams TC, MacRae C, Swann OV, Haseeb H, Cunningham S, Davies P, et al. Indirect effects of the COVID-19 pandemic on paediatric healthcare use and severe disease: a retrospective national cohort study. *Arch Dis Child.* 2021;15:15.
494. Winking M, Conzen M, Flechtenmacher J, Pumberger M. Effects of the COVID-19 Pandemic on the Management of Spinal Disorders - Results of a National Survey. *Z Orthop Unfall.* 2021;159(1):32-8.
495. Wirrell EC, Grinspan ZM, Knupp KG, Jiang Y, Hammeed B, Mytinger JR, et al. Care Delivery for Children With Epilepsy During the COVID-19 Pandemic: An International Survey of Clinicians. *J Child Neurol.* 2020;35(13):924-33.
496. Wong FL, Antoniou G, Williams N, Cundy PJ. Disruption of paediatric orthopaedic hospital services due to the COVID-19 pandemic in a region with minimal COVID-19 illness. *J Child Orthop.* 2020;14(4):245-51.
497. Wong JSH, Cheung KMC. Impact of COVID-19 on Orthopaedic and Trauma Service: An Epidemiological Study. *J Bone Joint Surg Am.* 2020;102(14):e80.
498. Wongtanasarasin W, Srisawang T, Yothiya W, Phinyo P. Impact of national lockdown towards emergency department visits and admission rates during the COVID-19 pandemic in Thailand: A hospital-based study. *Emerg Med Australas.* 2021;33(2):316-23.
499. Worm M, Ballmer-Weber B, Brehler R, Cuevas M, Gschwend A, Hartmann K, et al. Healthcare provision for insect venom allergy patients during the COVID-19 pandemic. *Allergo J Int.* 2020;29(8):257-61.
500. Wosik J, Clowse MEB, Overton R, Adagarla B, Economou-Zavlanos N, Cavalier J, et al. Impact of the COVID-19 pandemic on patterns of outpatient cardiovascular care. *Am Heart J.* 2021;231:1-5.
501. Wu C, Patel SN, Jenkins TL, Obeid A, Ho AC, Yonekawa Y. Ocular trauma during COVID-19 stay-at-home orders: a comparative cohort study. *Curr Opin Ophthalmol.* 2020;31(5):423-6.
502. Wu JH, Lee MK, Lee CY, Chen NH, Lin YC, Chen KK, et al. The impact of the COVID-19 epidemic on the utilization of dental services and attitudes of dental residents at the emergency department of a medical center in Taiwan. *J Dent Sci.* 2021;16(3):868-76.



503. Xu D, Starr MR, Boucher N, Chiang A, Yonekawa Y, Klufas MA, et al. Real-world vitreoretinal practice patterns during the 2020 COVID-19 pandemic: a nationwide, aggregated health record analysis. *Curr Opin Ophthalmol*. 2020;31(5):427-34.
504. Yagci I, Sarikaya S, Ayhan FF, Bahsi A, Bilir Kaya B, Erhan B, et al. The effects of COVID-19 on Physical Medicine and Rehabilitation in Turkey in the first month of pandemic. *Turk J Phys Med Rehabil*. 2020;66(3):244-51.
505. Yahyaoui Y, Ghodhmani Z, Hamdi A, Letaief F, Zenzri Y, Ben Said A, et al. Suggestion of Tunisia's medical oncologist in the management of breast cancer during COVID-19 pandemic. *J Oncol Pharm Pract*. 2020;26(7):1732-4.
506. Yang YT, Xing X, Sreekissoon S, Li Z. Impact of Transmission Control Measures on the Epidemiology of Maxillofacial Injuries in Wuhan City During the COVID-19 Epidemic. *J Craniofac Surg*. 2021; Publish Ahead of Print:07.
507. Yang YT, Zhang W, Xie L, Li ZB, Li Z. Characteristic changes of traumatic dental injuries in a teaching hospital of Wuhan under transmission control measures during the COVID-19 epidemic. *Dent Traumatol*. 2020;36(6):584-9.
508. Yeung E, Brandsma DS, Karst FW, Smith C, Fan KFM. The influence of 2020 coronavirus lockdown on presentation of oral and maxillofacial trauma to a central London hospital. *Br J Oral Maxillofac Surg*. 2021;59(1):102-5.
509. Zadnik V, Mihor A, Tomsic S, Zagar T, Bric N, Lokar K, et al. Impact of COVID-19 on cancer diagnosis and management in Slovenia - preliminary results. *Radiol Oncol*. 2020;54(3):329-34.
510. Zagra L, Faraldi M, Pregliasco F, Vinci A, Lombardi G, Ottaiano I, et al. Changes of clinical activities in an orthopaedic institute in North Italy during the spread of COVID-19 pandemic: a seven-week observational analysis. *Int Orthop*. 2020;44(8):1591-8.
511. Zhang D, Fu Y, Zhou L, Liang N, Wang T, Del Rio P, et al. Thyroid surgery during coronavirus-19 pandemic phases I, II and III: lessons learned in China, South Korea, Iran and Italy. *J Endocrinol Invest*. 2021;44(5):1065-73.
512. Zhang H, Guo LW, Gao YY, Yao H, Xie ZK, Zhang WX. The Impact of the COVID-19 Pandemic on Pediatric Clinical Practice in Wenzhou, China: A Retrospective Study. *Front Pediatr*. 2020;8:585629.
513. Zhang Y, Xiang D, Alejok N. Coping with COVID-19 in United Nations peacekeeping field hospitals: increased workload and mental stress for military healthcare providers. *BMJ Mil Health*. 2020;11:11.
514. Zhao J, Wang Y, Fisher M, Liu R. Slower recovery of outpatient clinics than inpatient services for stroke and other neurological diseases after COVID-19 Pandemic. *CNS Neurosci Ther*. 2020;26(12):1322-6.
515. Zhong J, Datta A, Gordon T, Adams S, Guo T, Abdelaziz M, et al. The Impact of COVID-19 on Interventional Radiology Services in the UK. *Cardiovasc Intervent Radiol*. 2021;44(1):134-40.
516. Ziade N, Hmamouchi I, El Kibbi L, Abdulateef N, Halabi H, Abutiban F, et al. The impact of COVID-19 pandemic on rheumatology practice: a cross-sectional multinational study. *Clin Rheumatol*. 2020;39(11):3205-13.
517. Zingone F, Casadei C, Farinati F, Savarino E. No need of transforming gastroenterology units to covid units at the time of SARS-COV2 infection - a single-center analysis from northern Italy. *Dig Liver Dis*. 2020;52(10):1094-6.
